# Supplementary material
Source: ML conference proceedings conference paper supplement (https://openreview.net/forum?id=FwdN0KovFp)

Gaussian init.

$$q^{l,t}$$

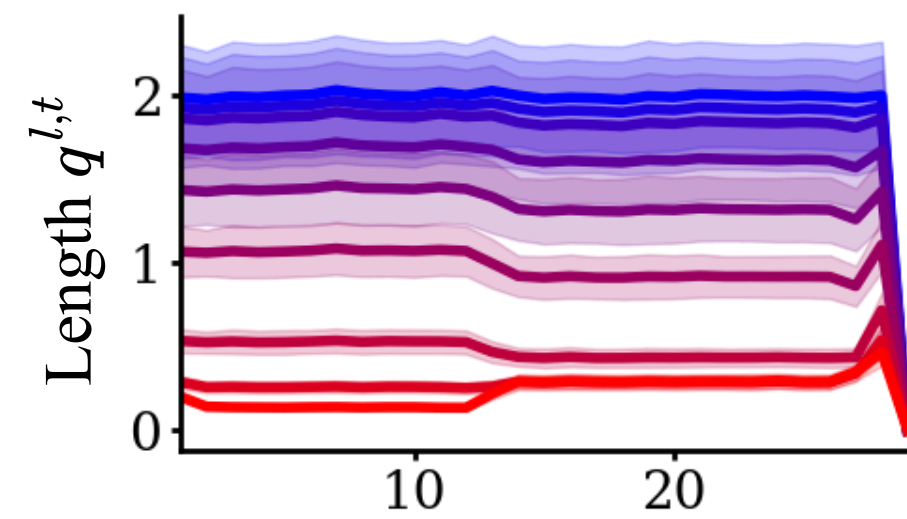

Layer  $l$   
(a)

$$q/p$$

$$T = 2000$$

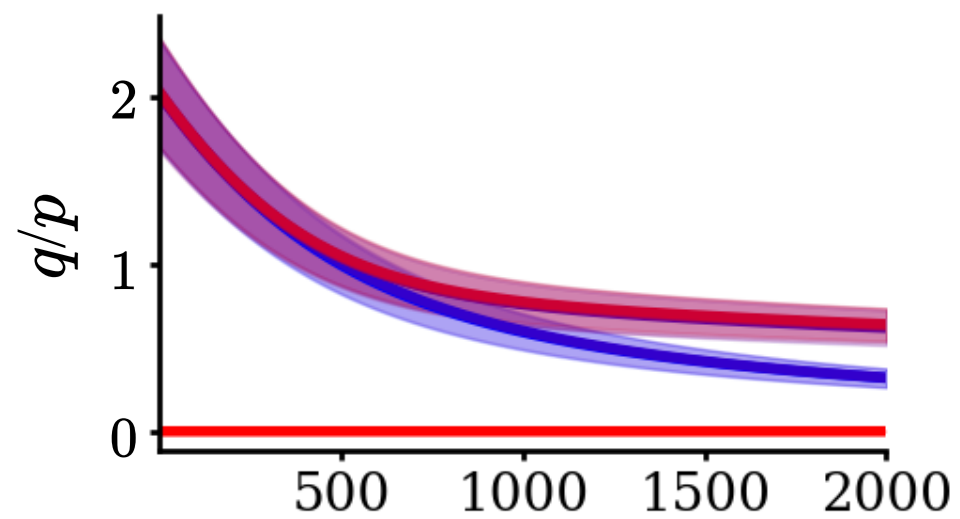

Iteration  $t$   
(b)

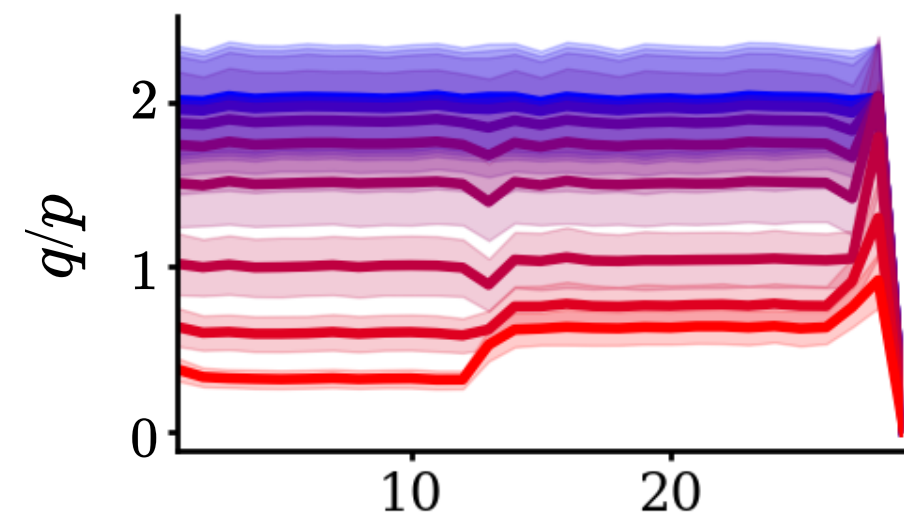

Layer  $l$   
(c)

$$r^{l,t}$$

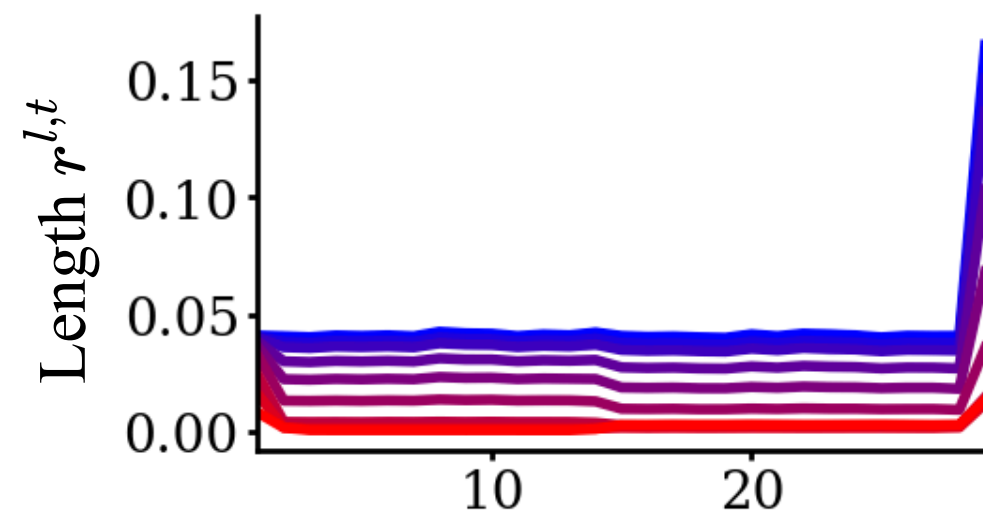

Layer  $l$   
(d)

(a), (c), (d),  
(e), (g), (h)

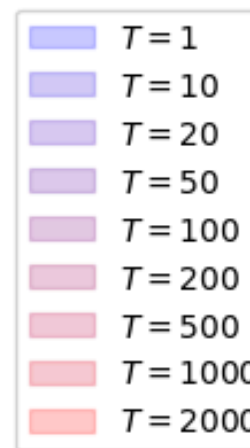

Feed-forward init.

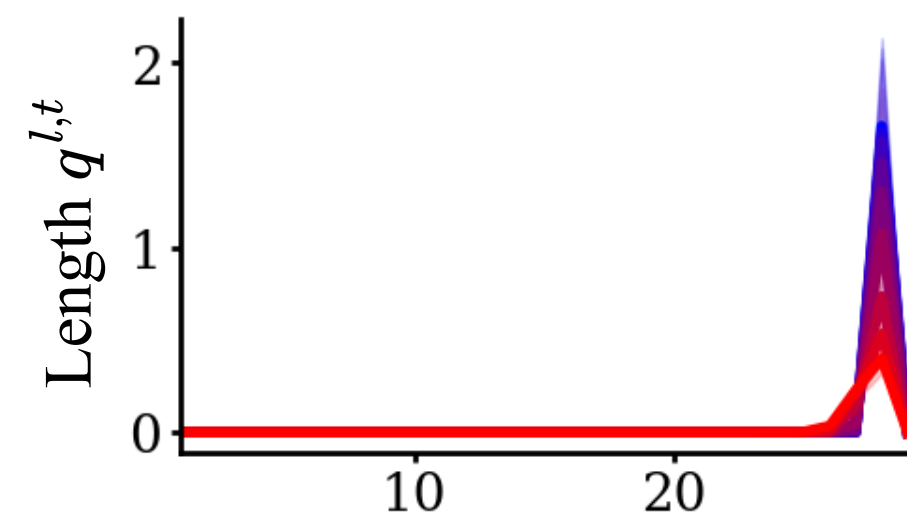

Layer  $l$   
(e)

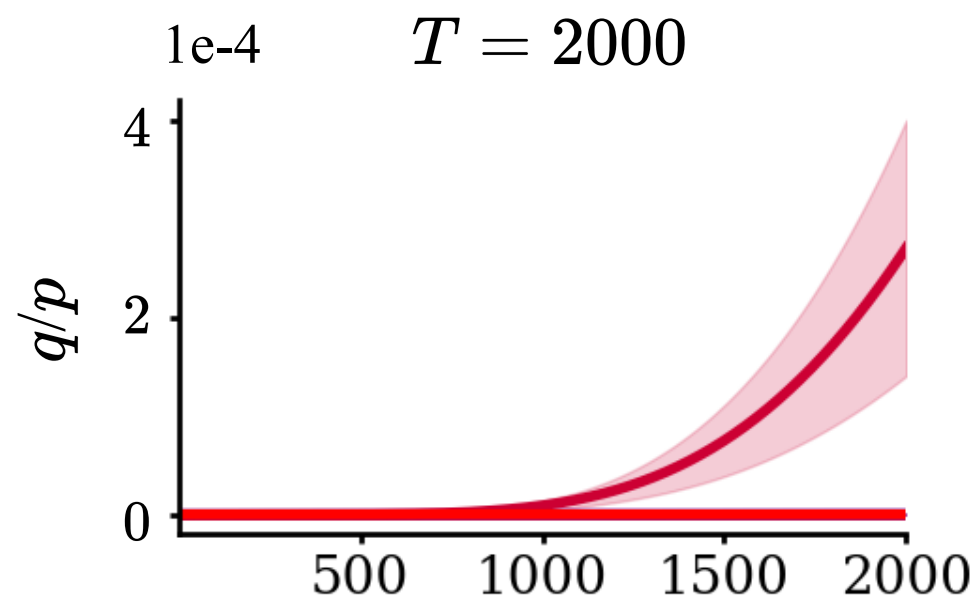

Iteration  $t$   
(f)

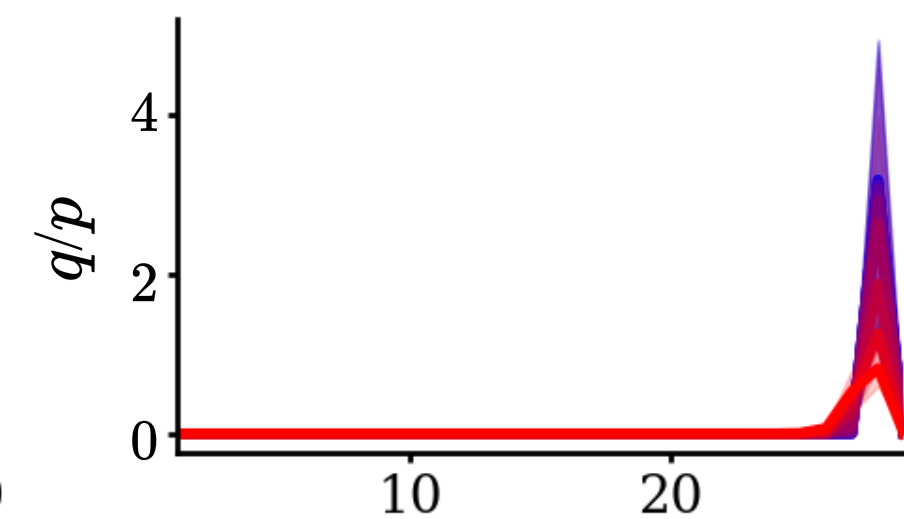

Layer  $l$   
(g)

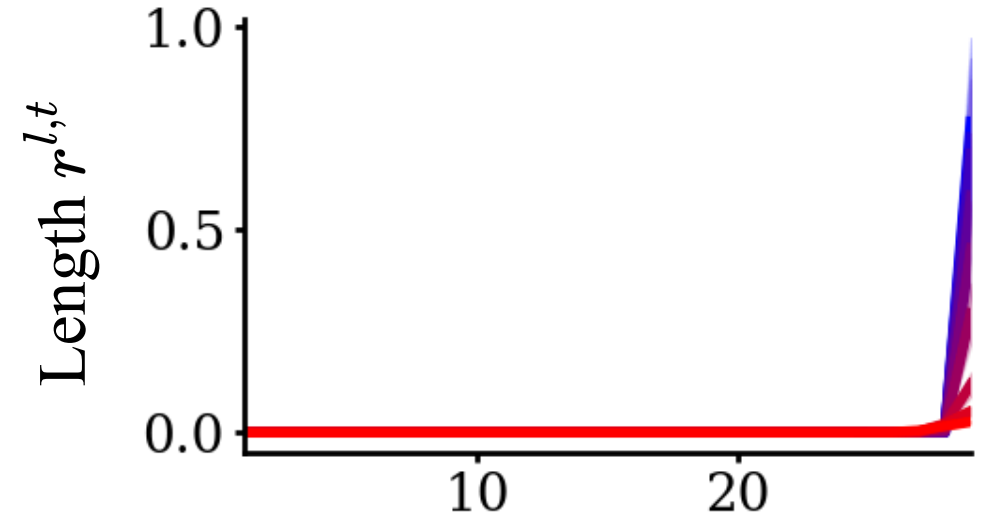

Layer  $l$   
(h)

(b), (f)

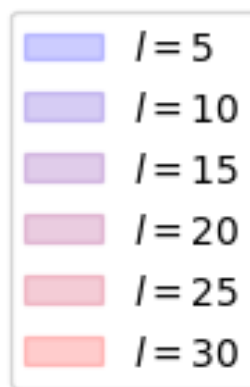

Supplement: supplementary_material [file attachment]
