# Supplementary material
Source: ML conference proceedings conference paper supplement (https://openreview.net/forum?id=FwdN0KovFp)

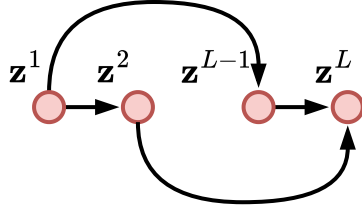

(a) Training stage 1

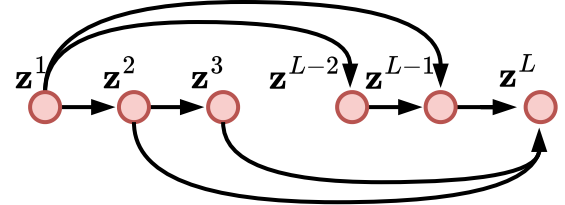

(b) Training stage 2

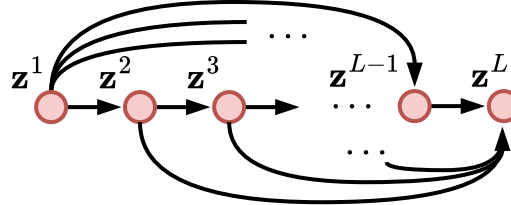

(c) Training stage  $\left\lfloor \frac{L-1}{2} \right\rfloor$

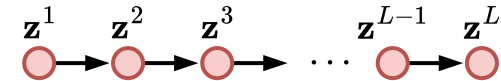

(d) Evaluation

Supplement: supplementary_material [file attachment]

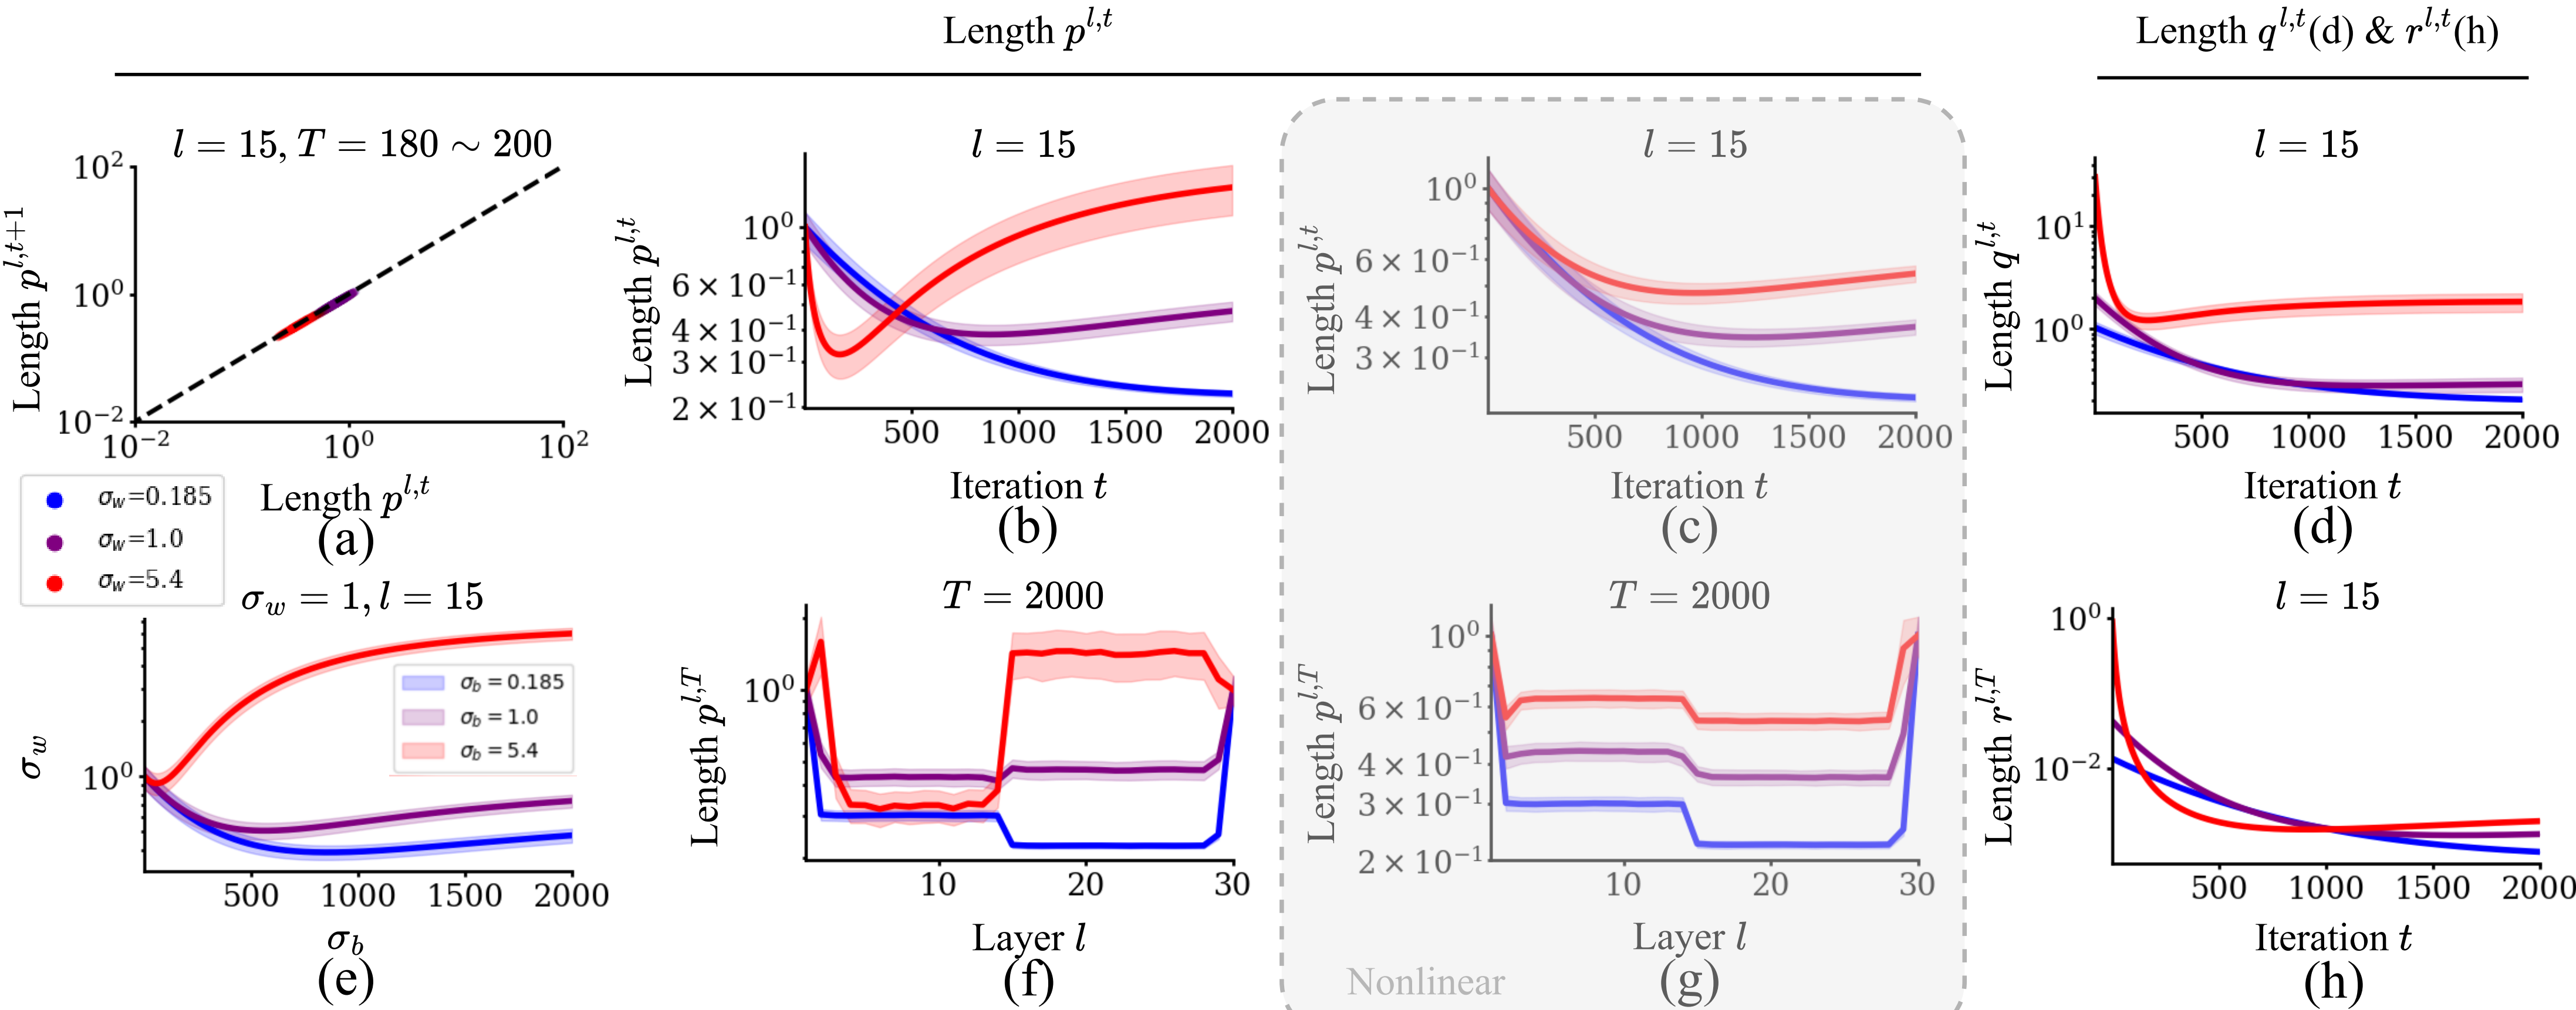

Supplement: supplementary_material [file attachment]

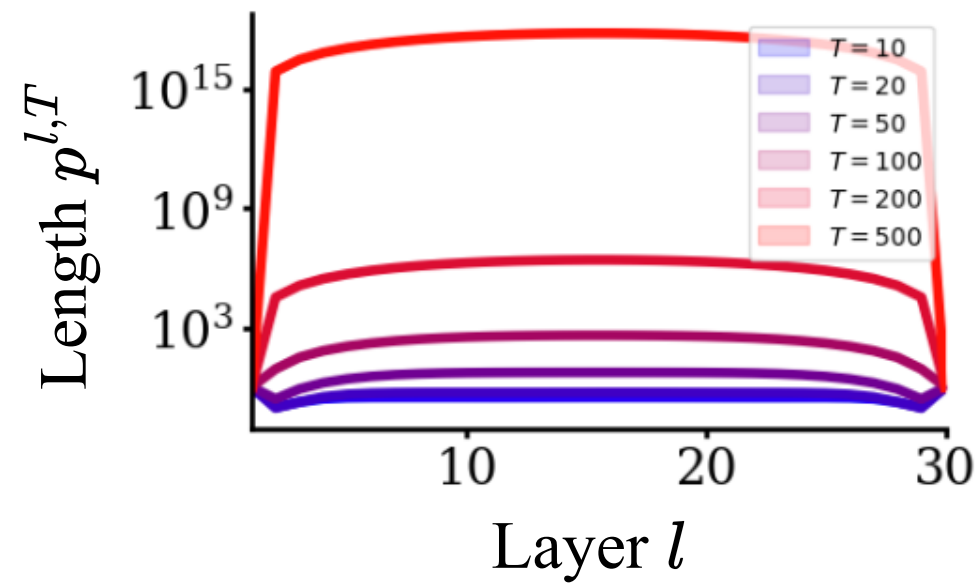

(a)

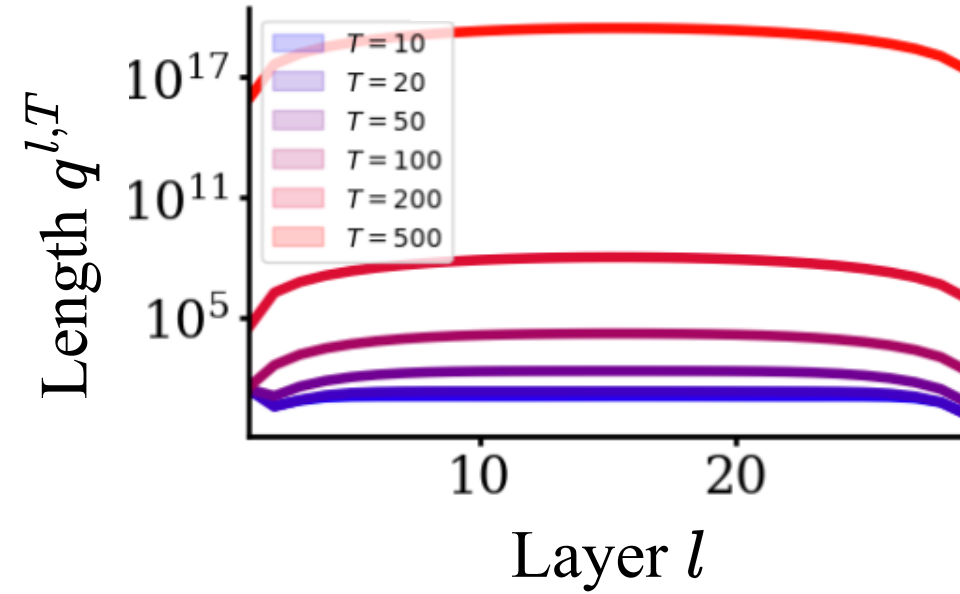

(b)

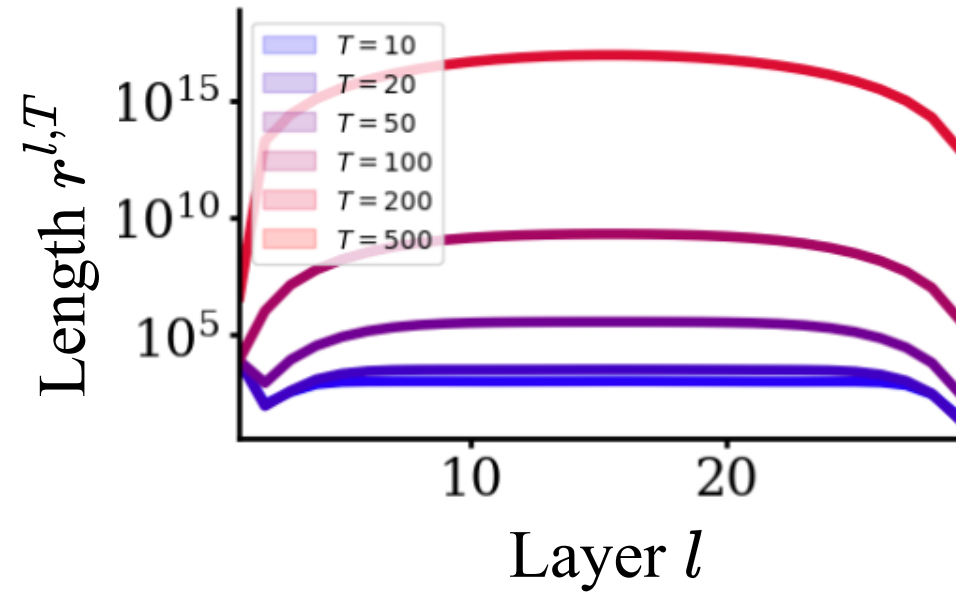

(c)

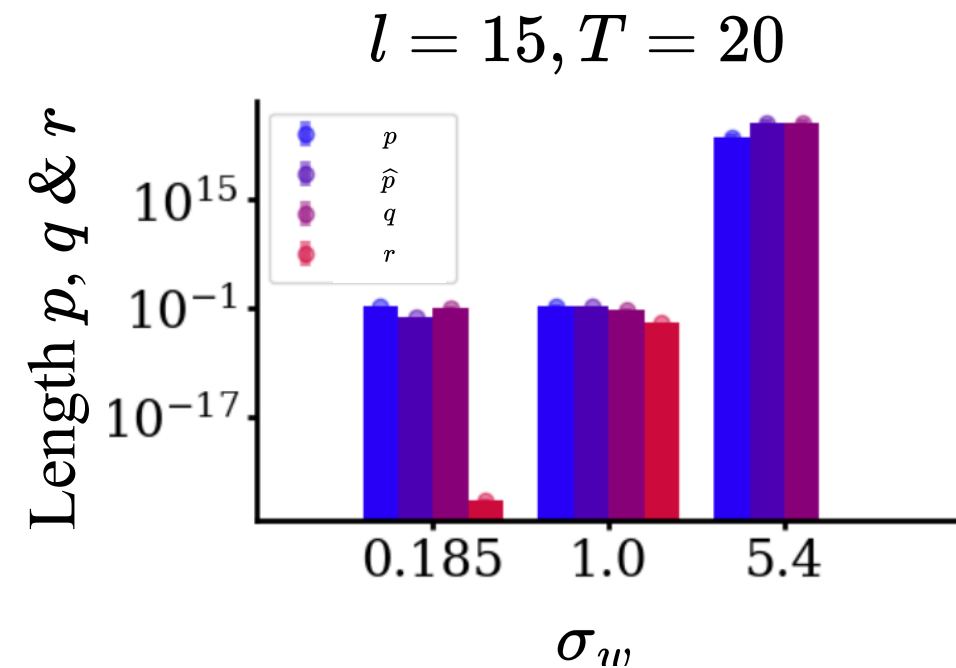

(d)

Supplement: supplementary_material [file attachment]

$l = 15$ 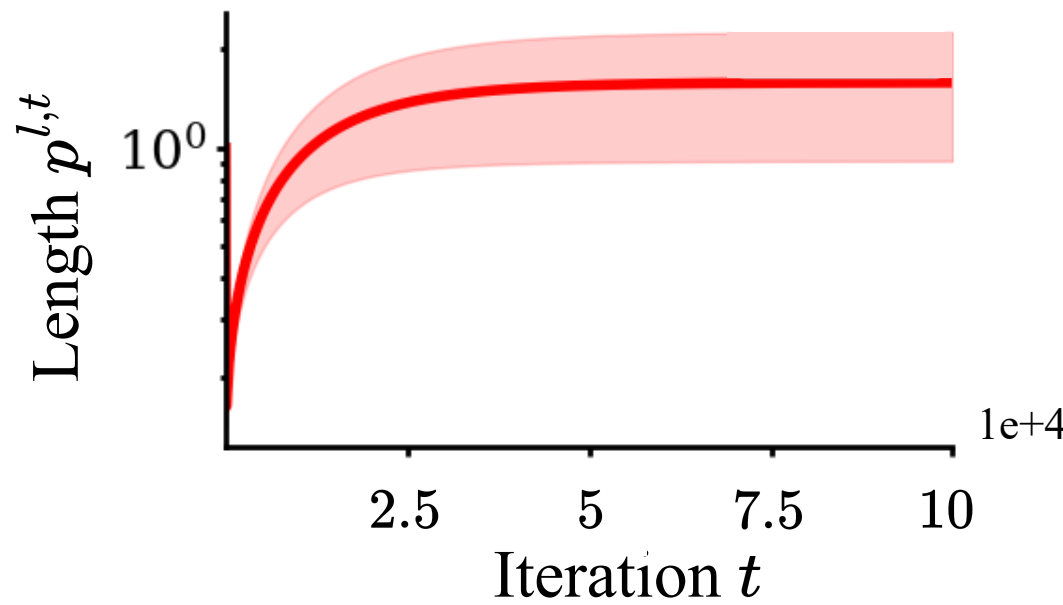 $l = 15$ 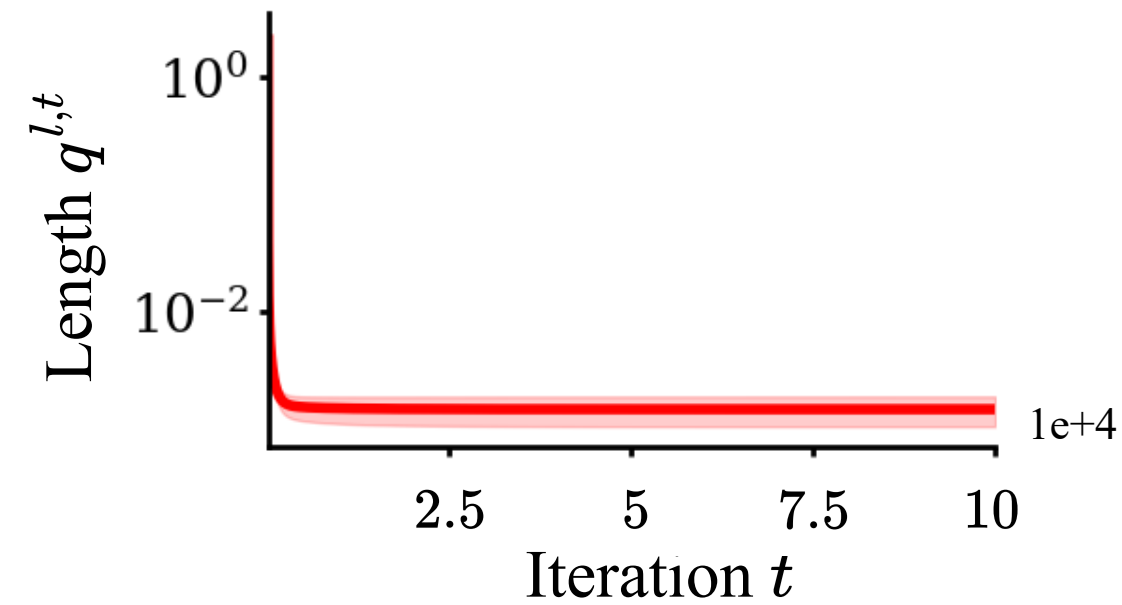 $T = 100,000$ 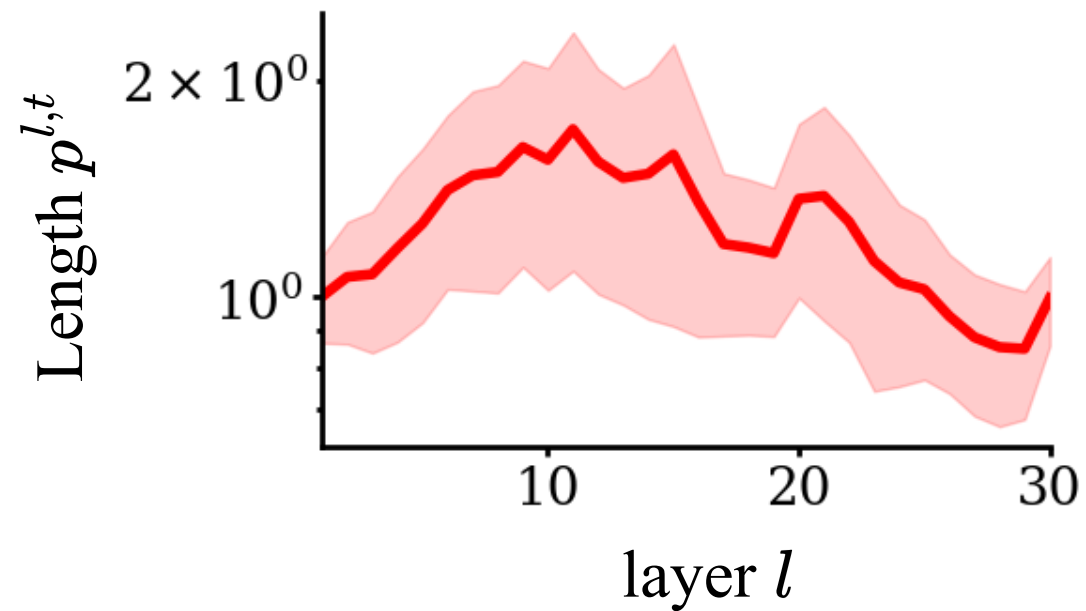 $T = 100,000$ 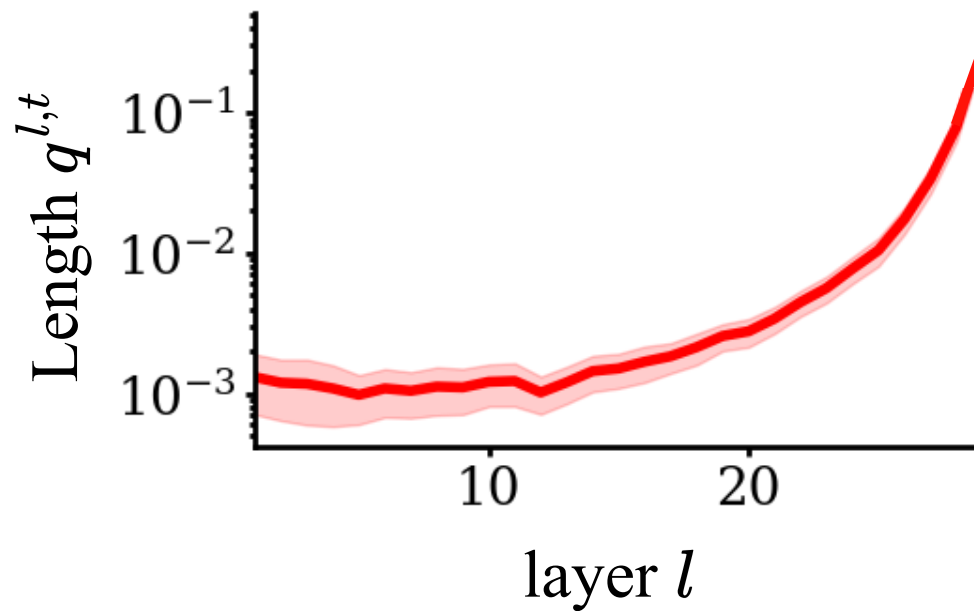

Supplement: supplementary_material [file attachment]

Linear

$$\eta = 0.45$$

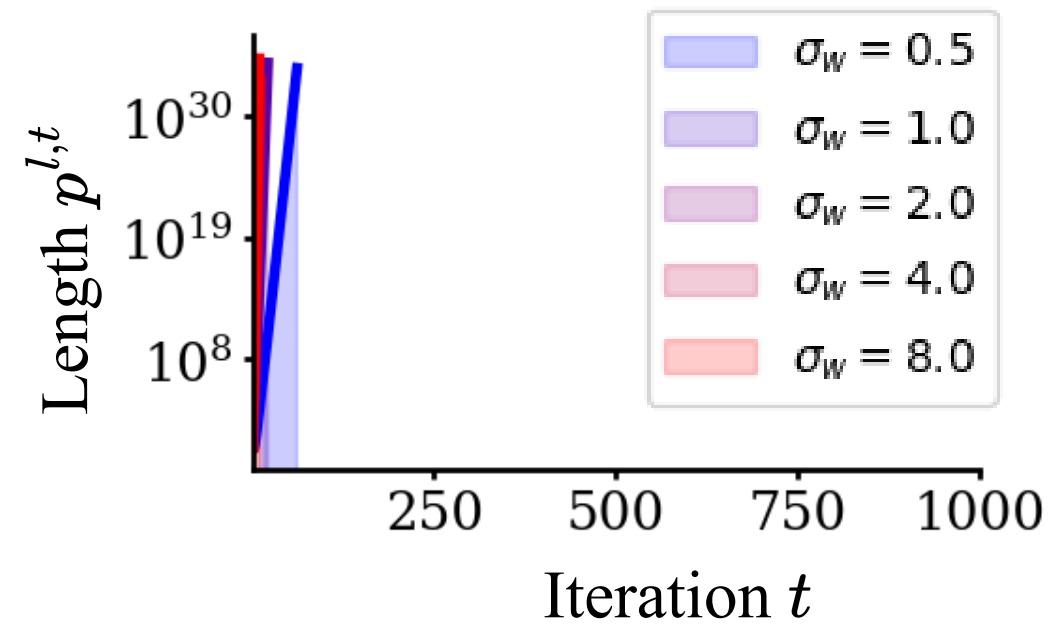

$$\eta = 0.2$$

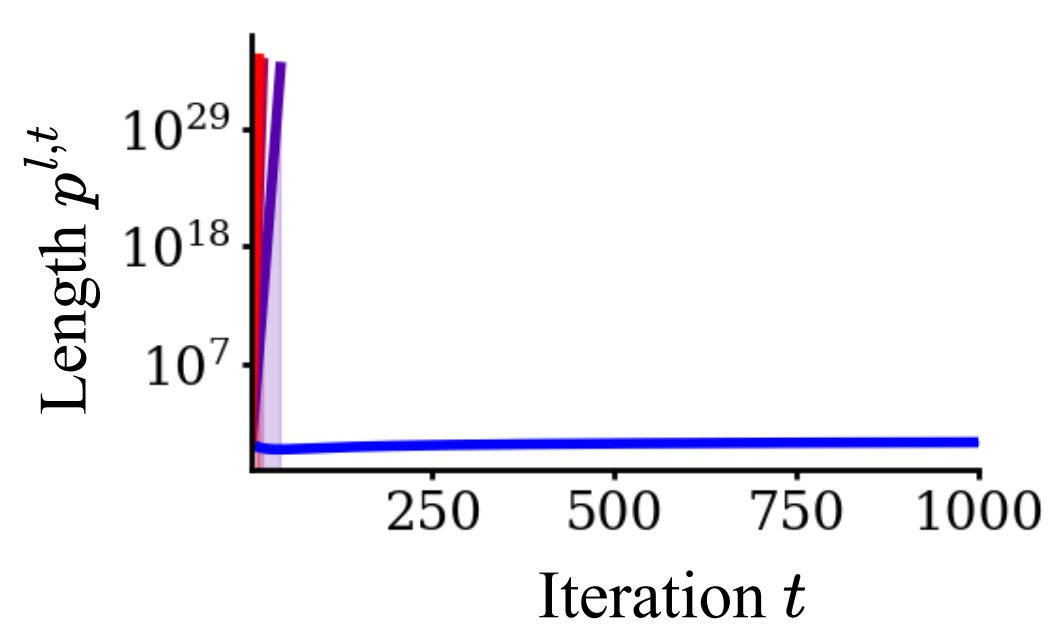

$$\eta = 0.05$$

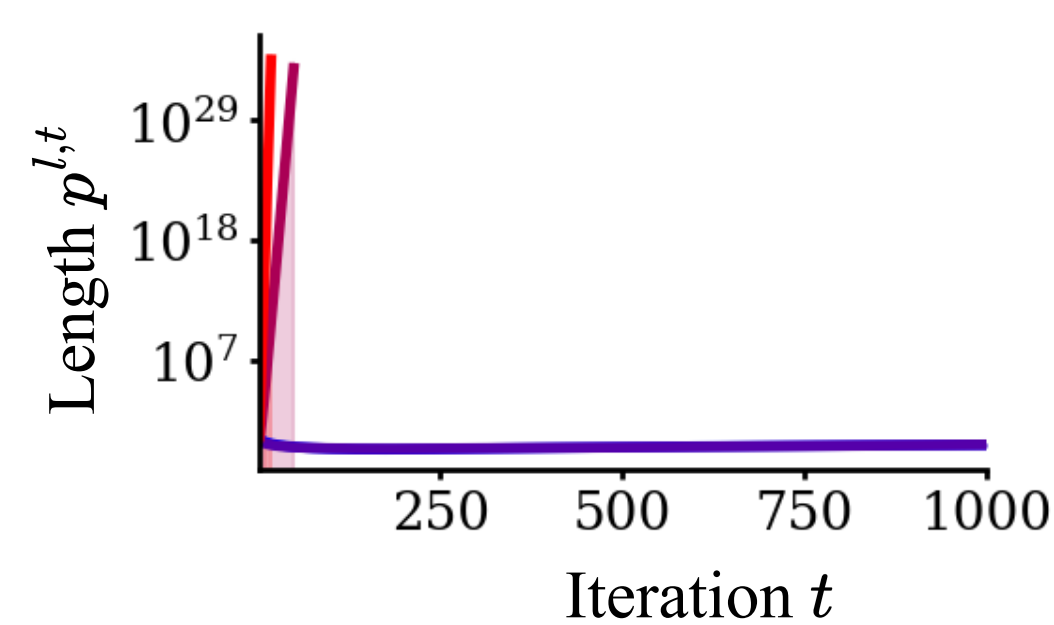

$$\eta = 0.01$$

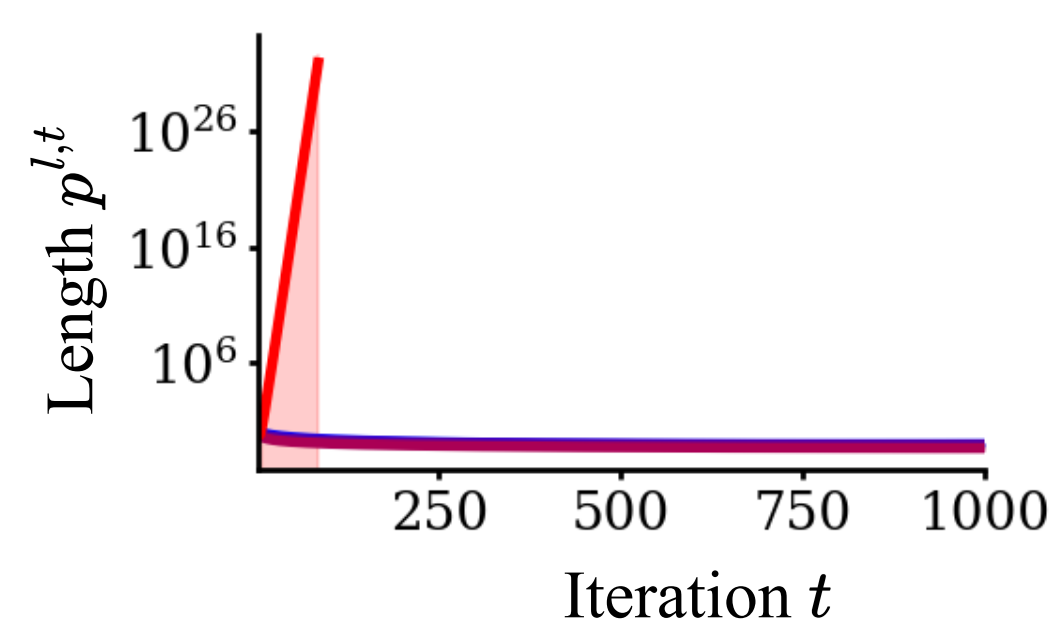

tanh

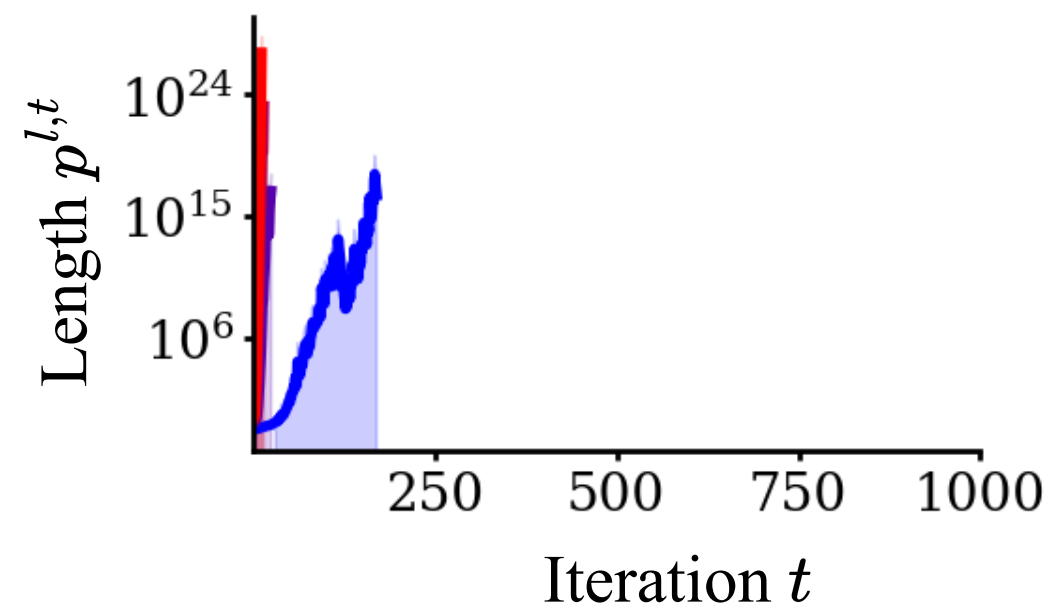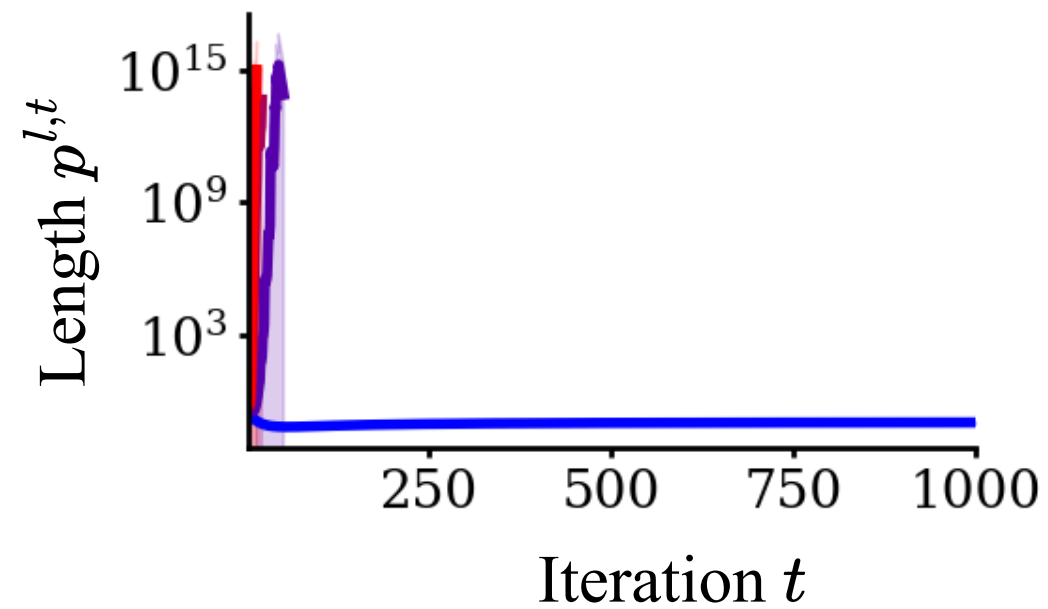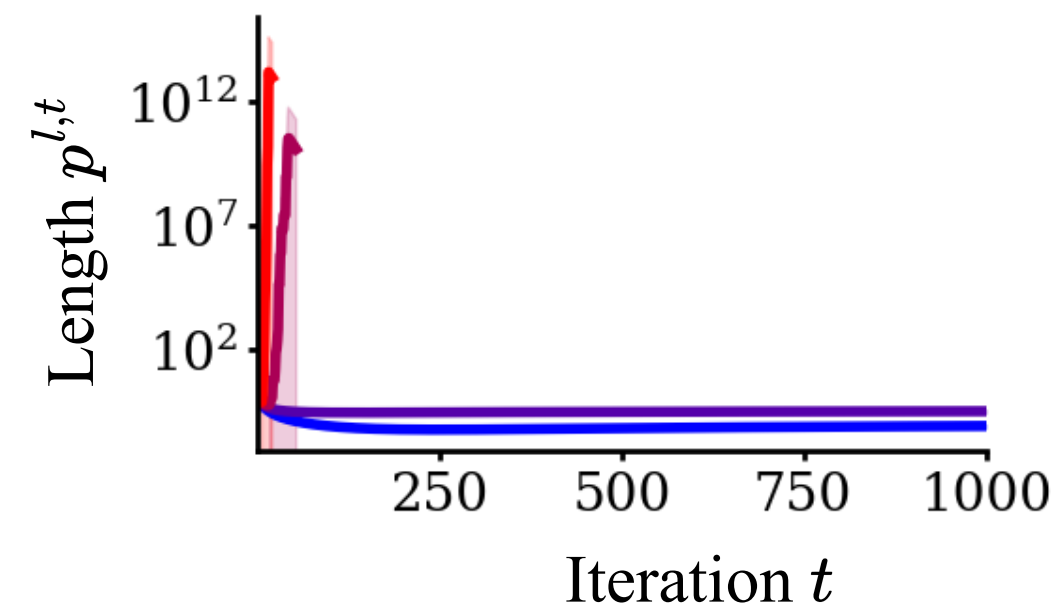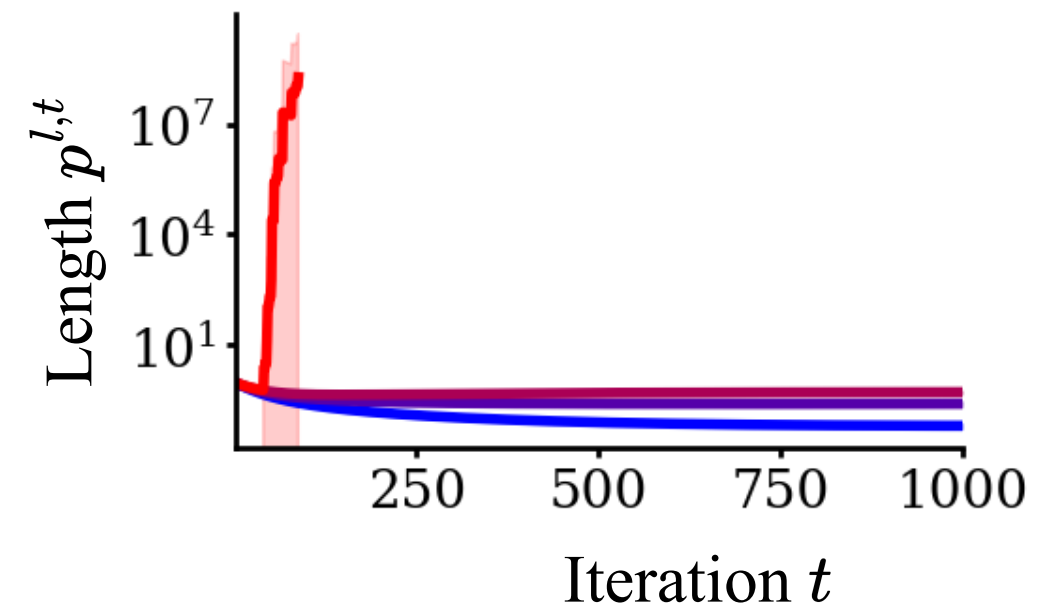

Supplement: supplementary_material [file attachment]

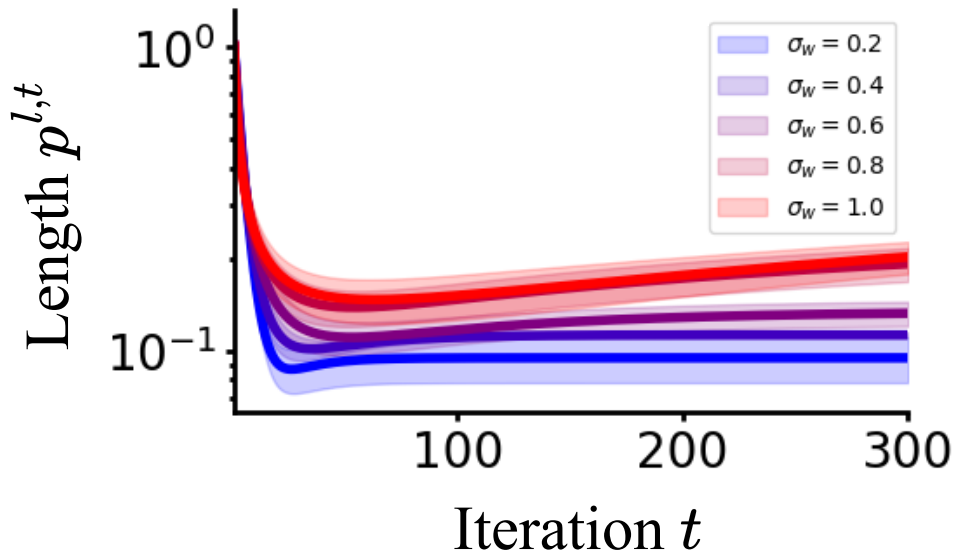

Supplement: supplementary_material [file attachment]

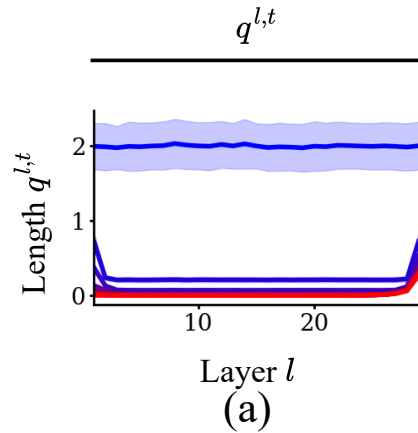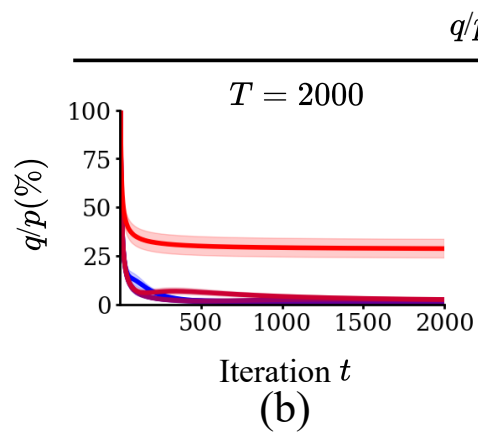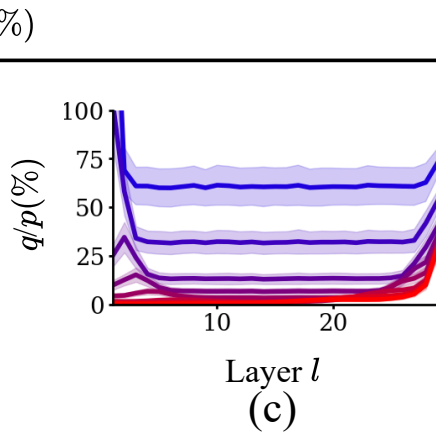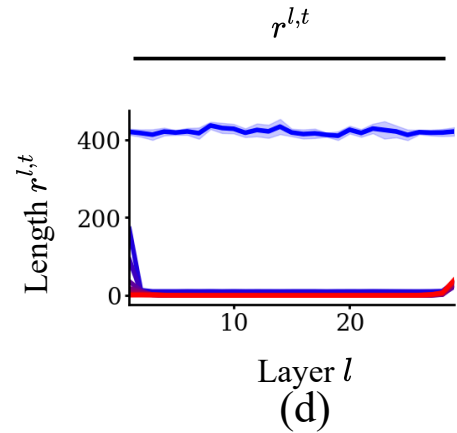

(a), (c), (d)

(b)

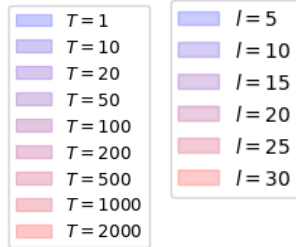

Supplement: supplementary_material [file attachment]

tanh

ReLU

SELU

SiLU

 $p$ 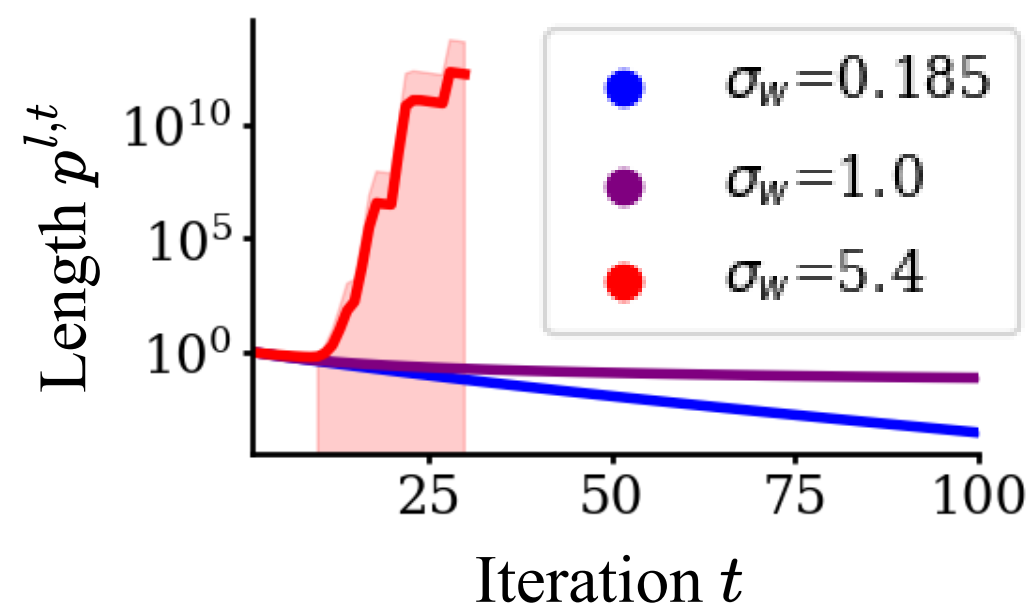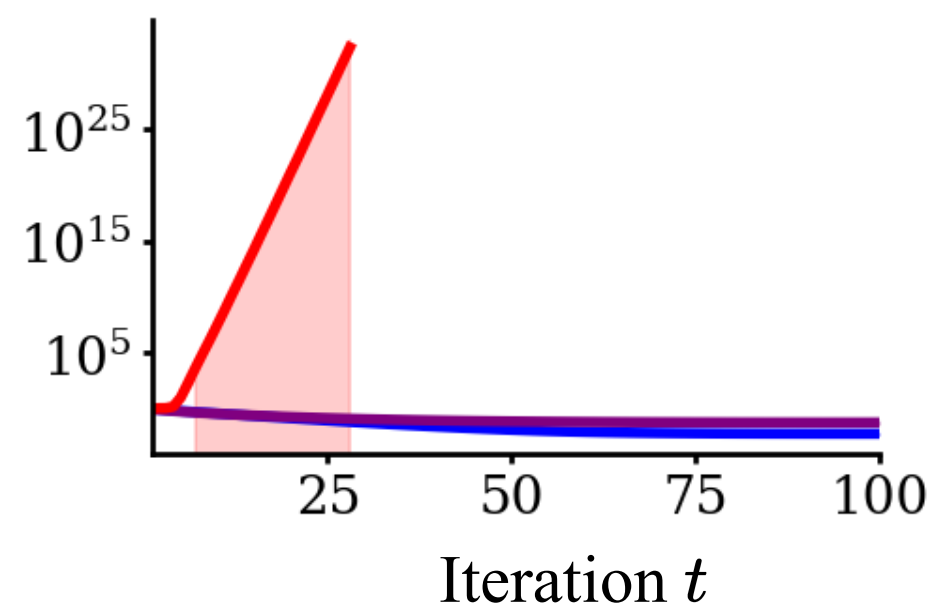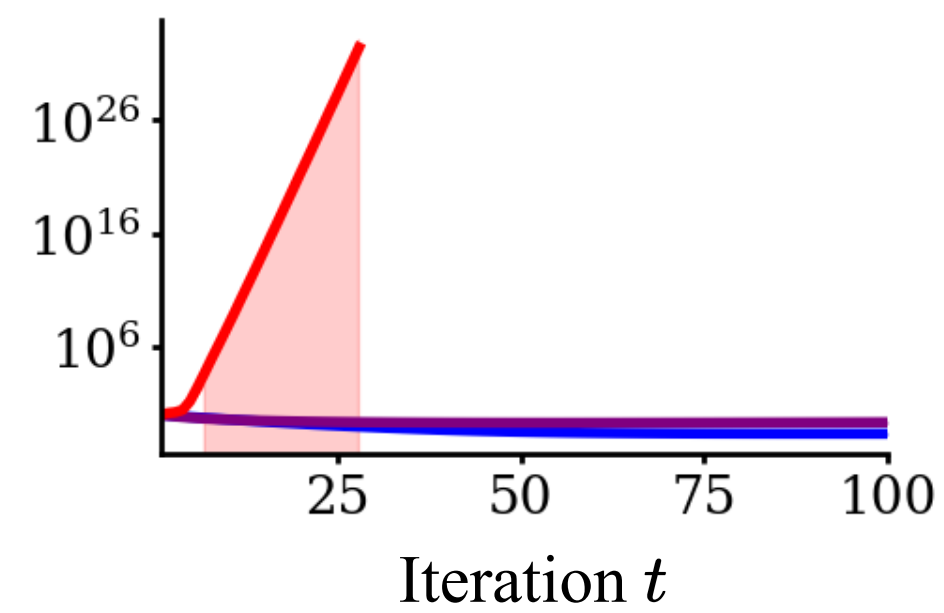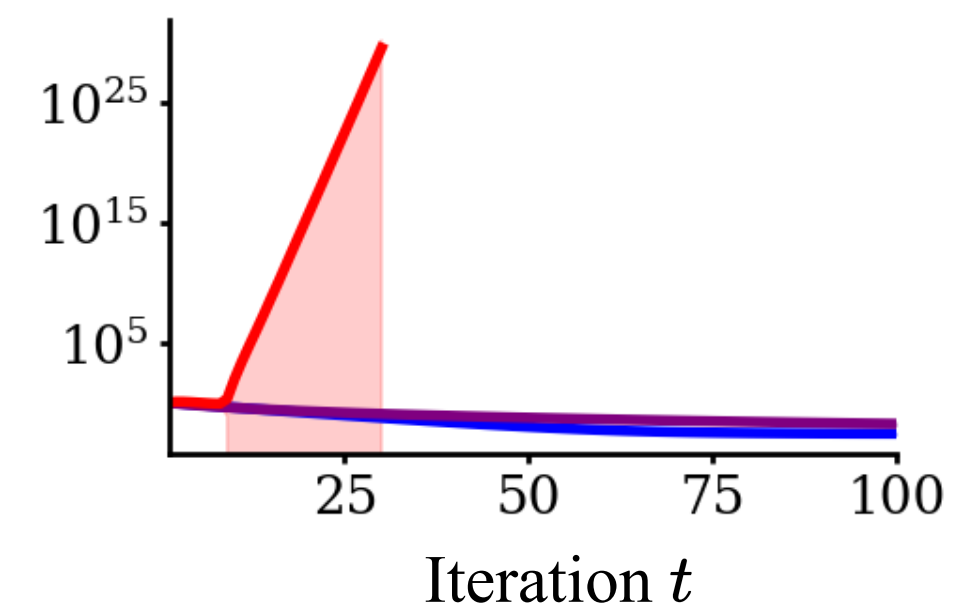 $l = 27$ 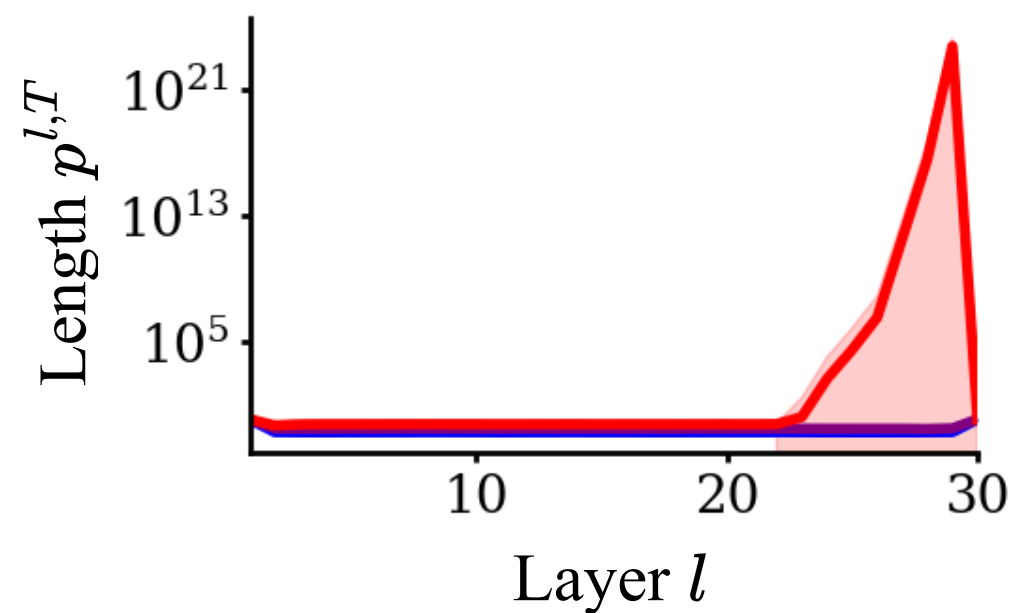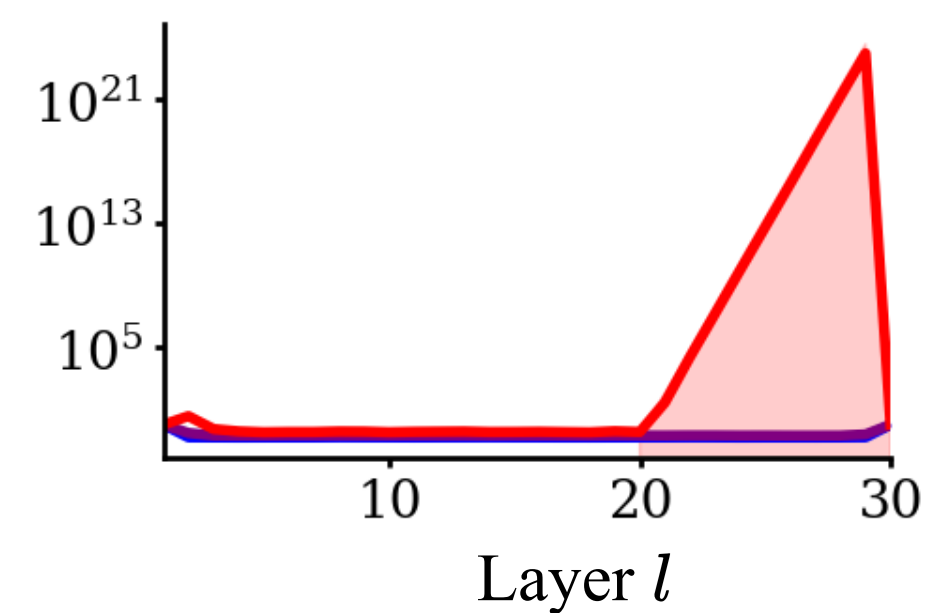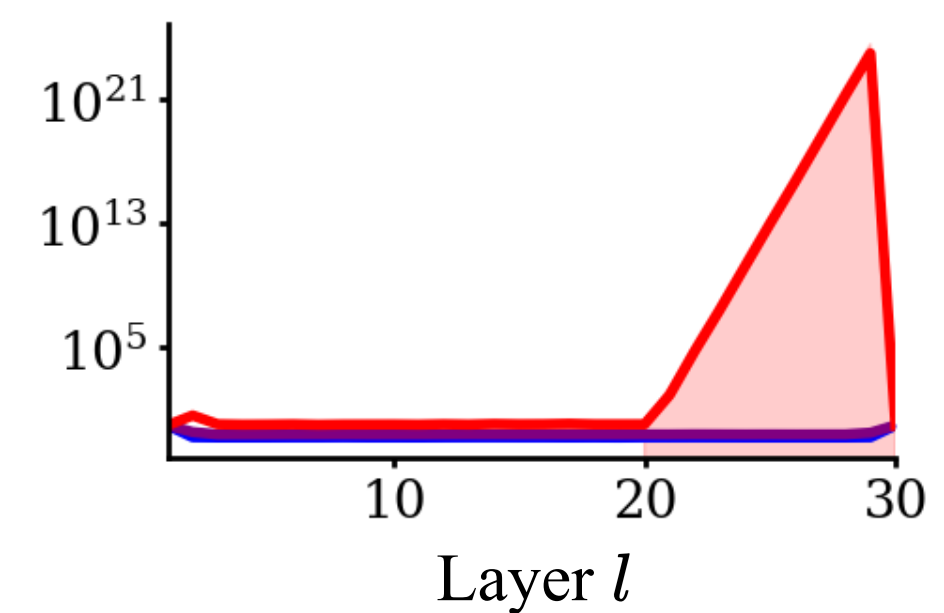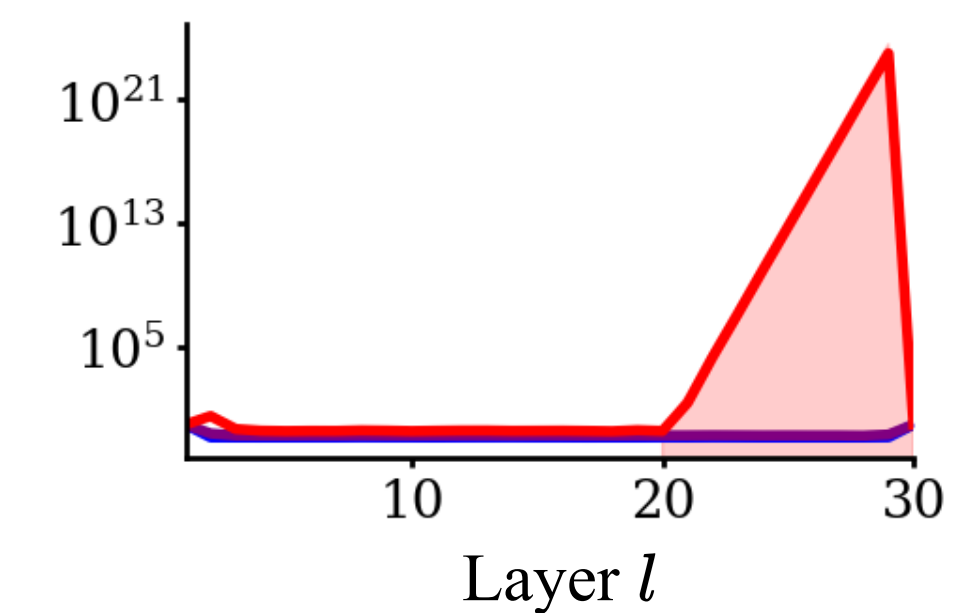 $T = 20$  $q$ 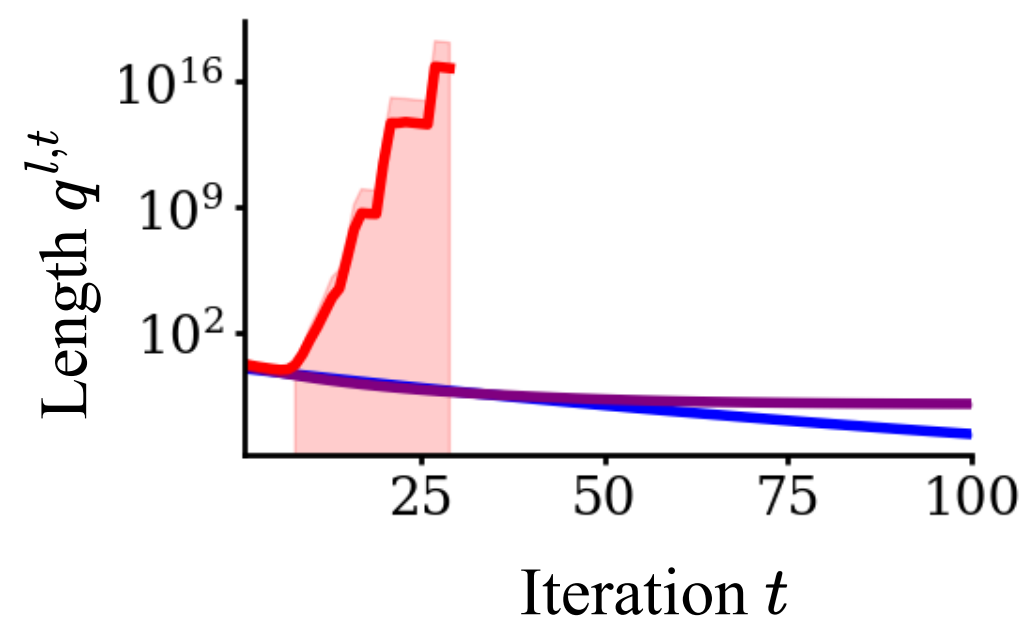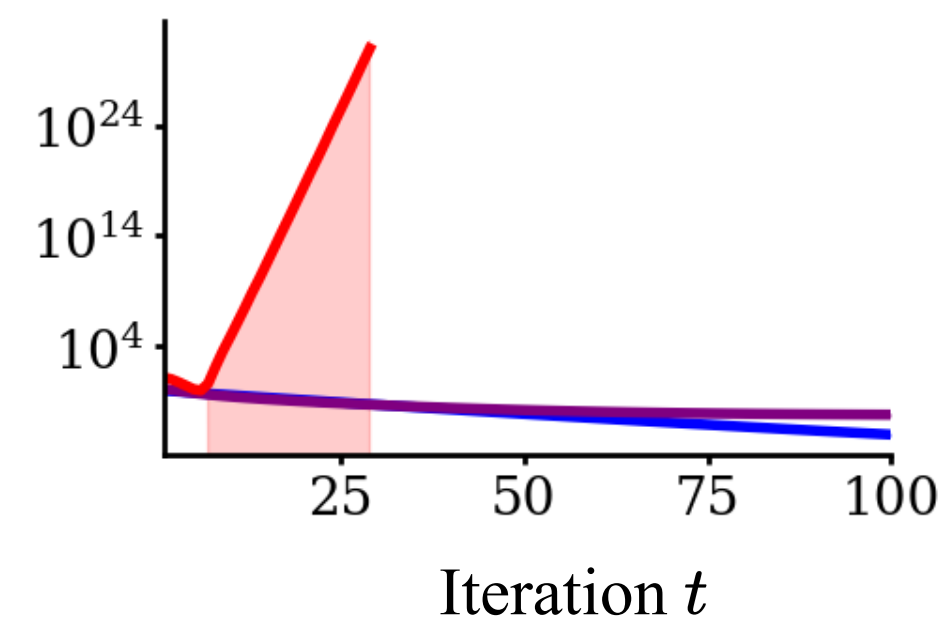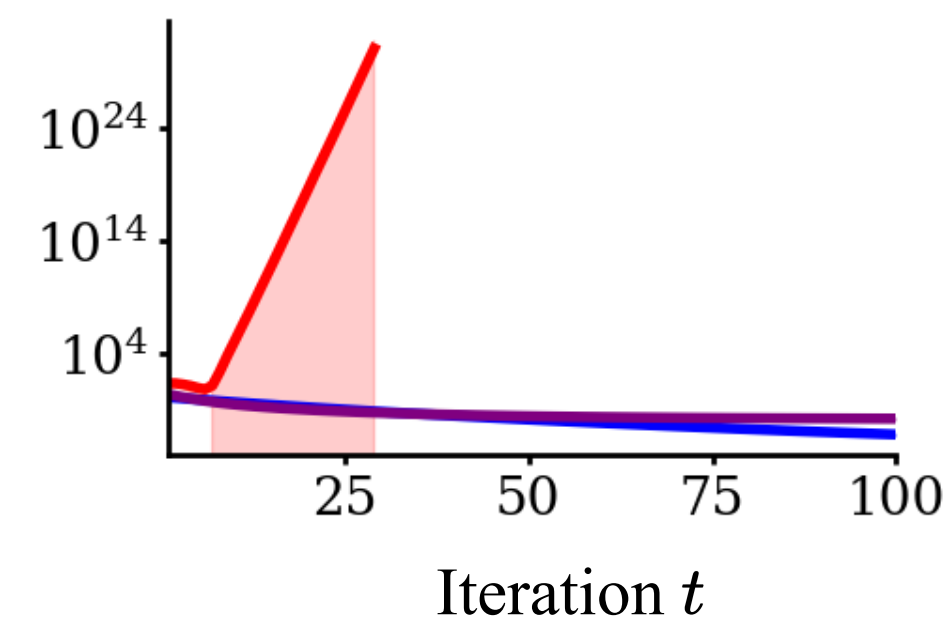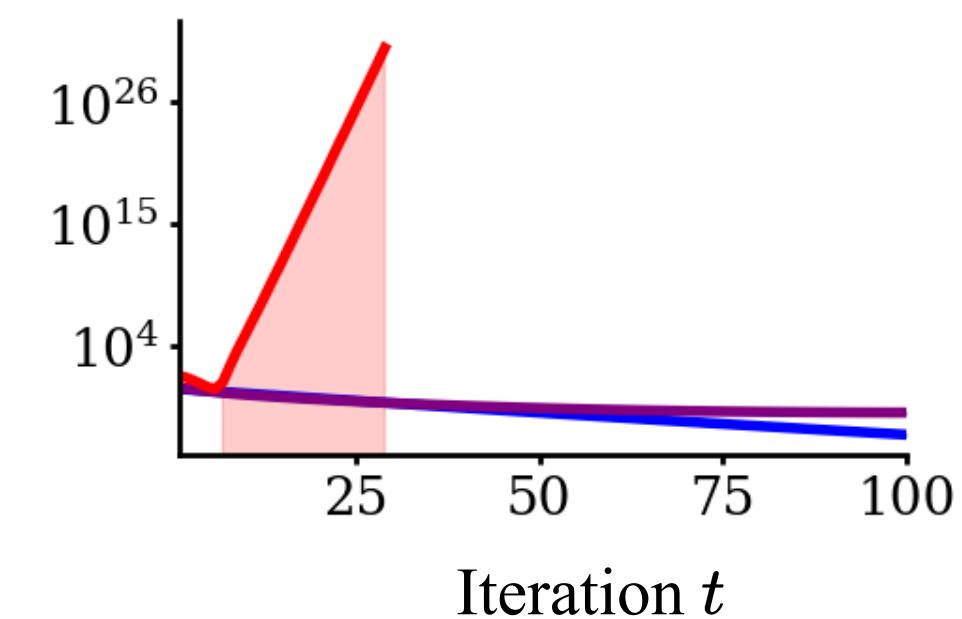 $l = 27$ 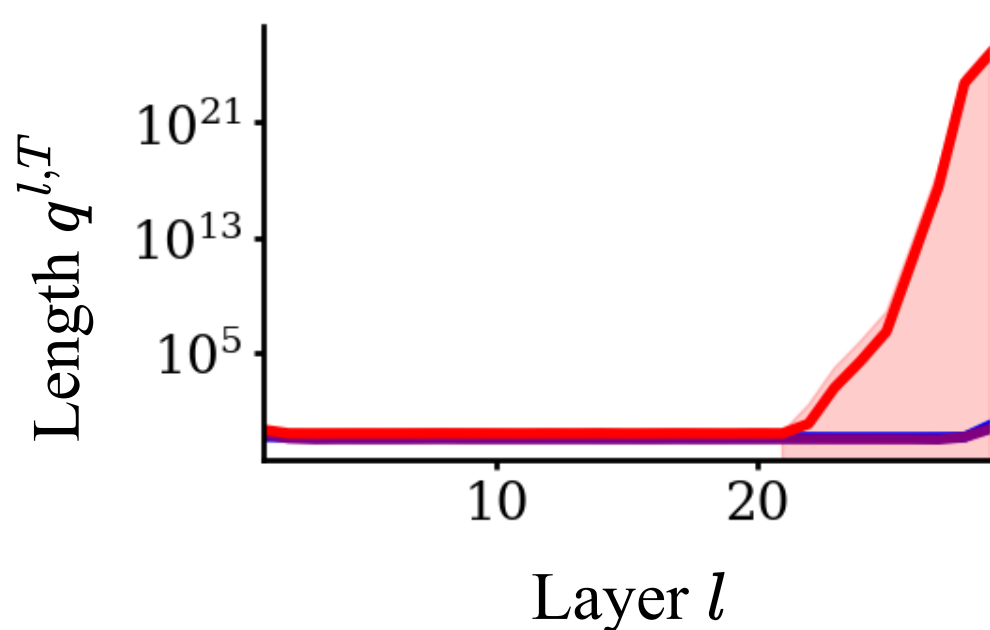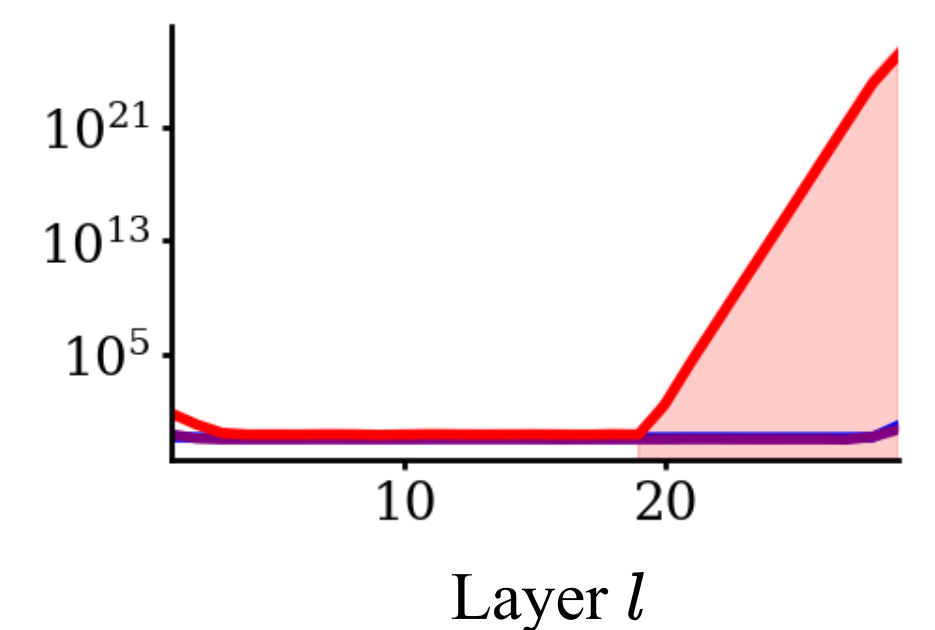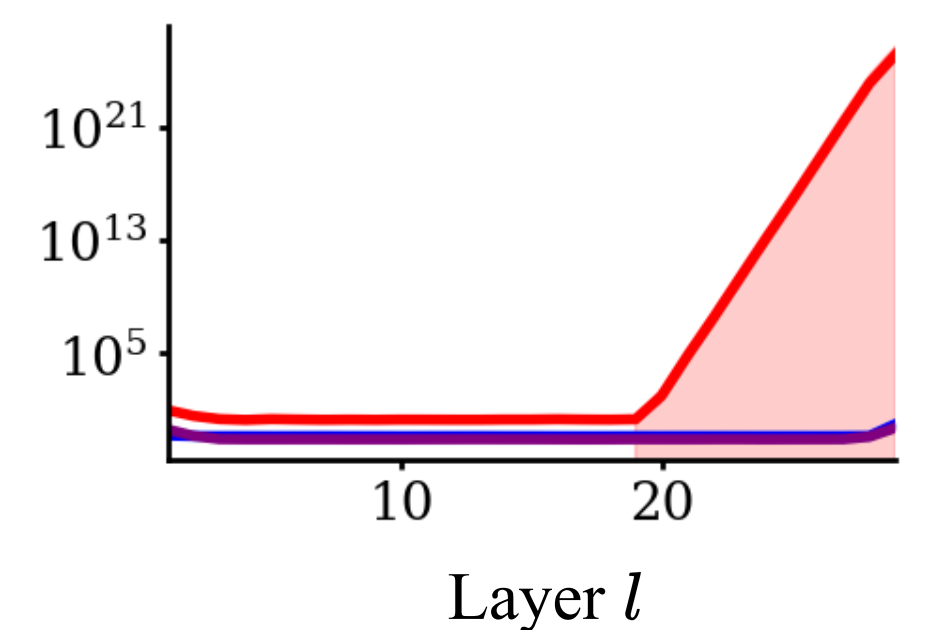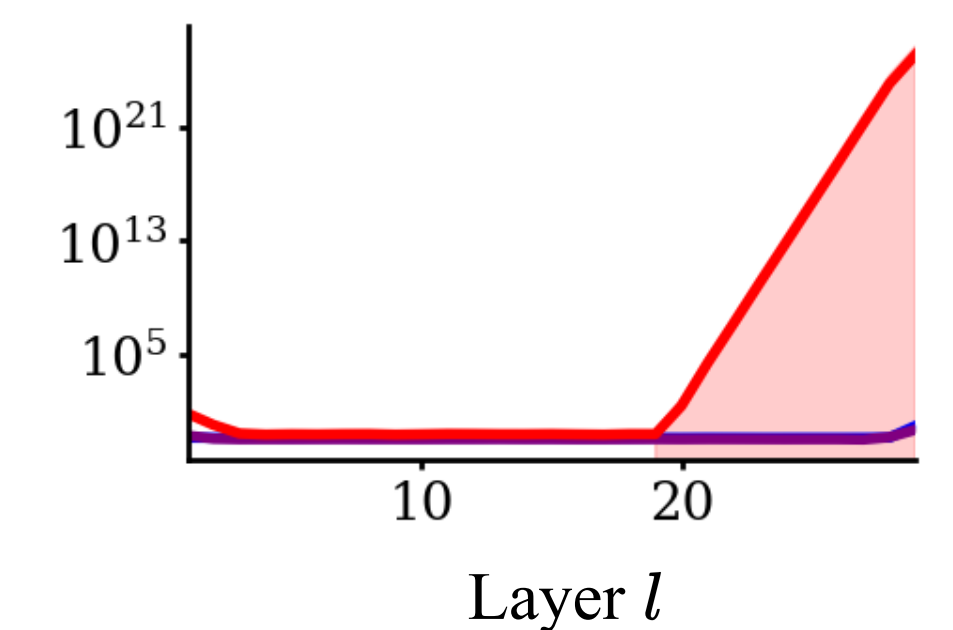 $T = 20$  $r$ 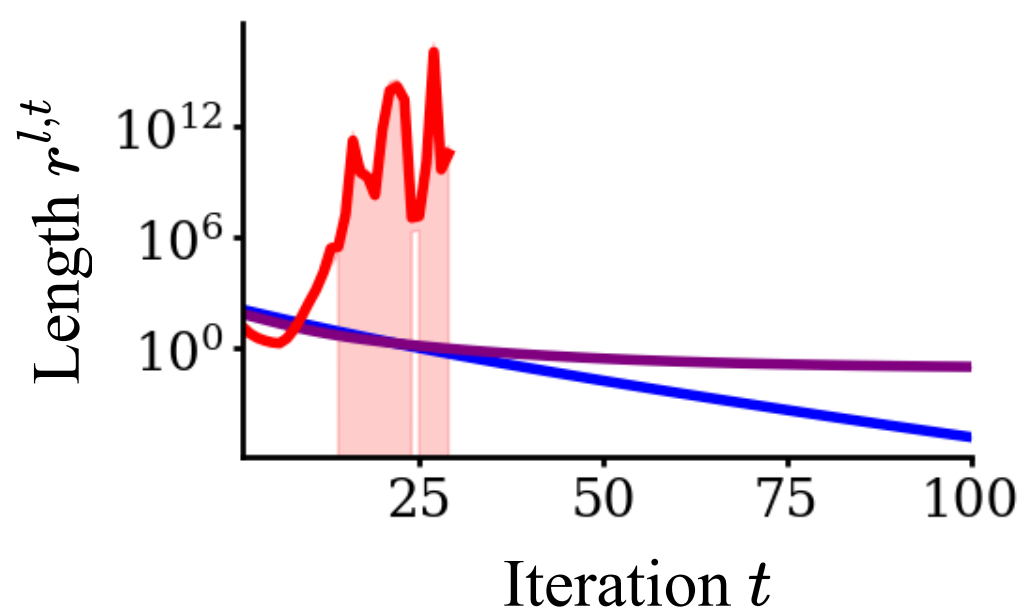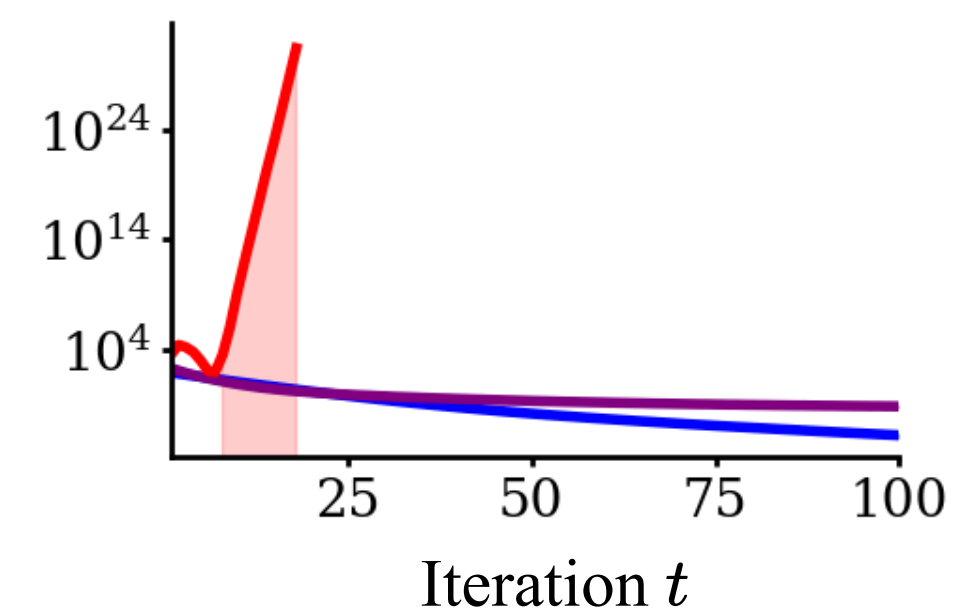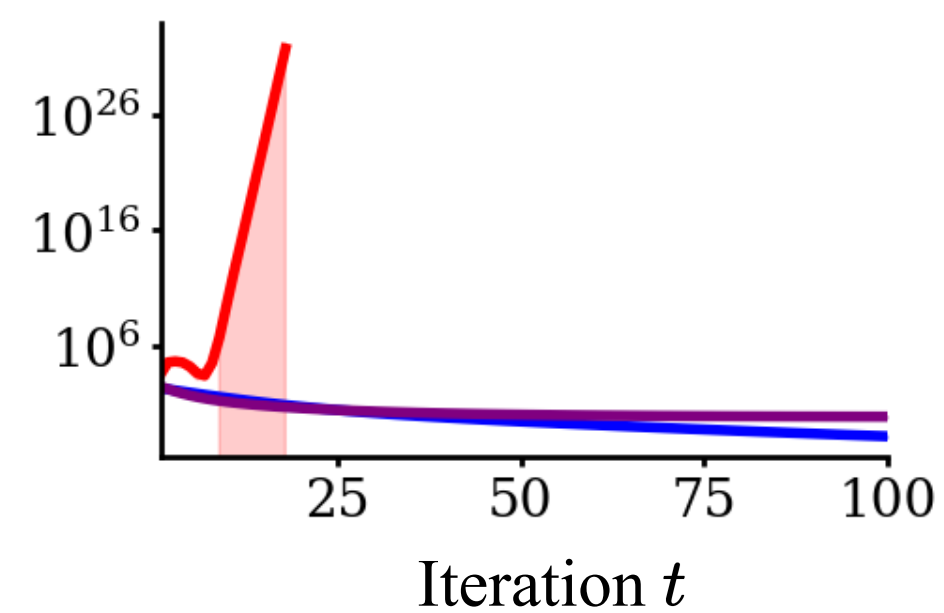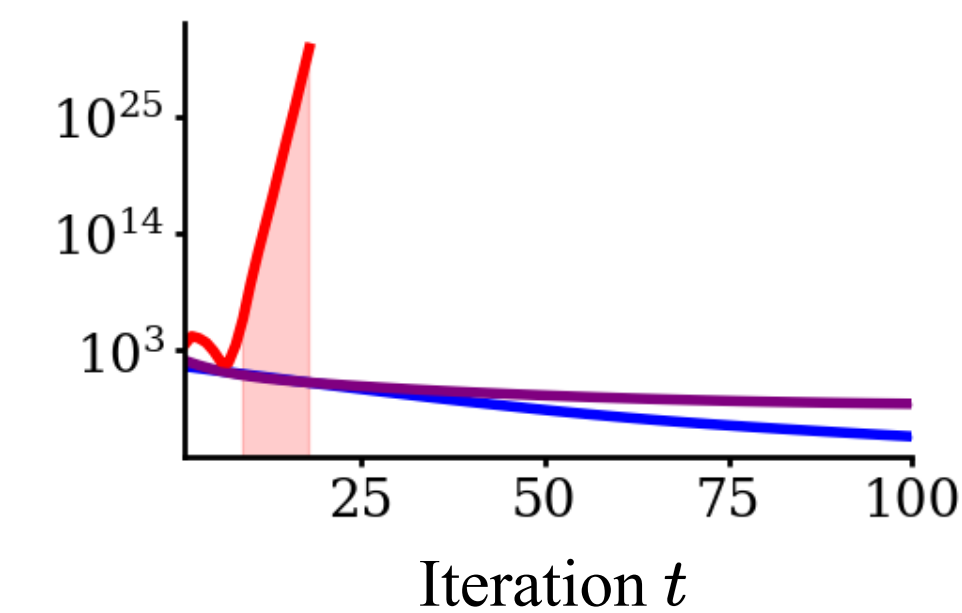 $l = 27$ 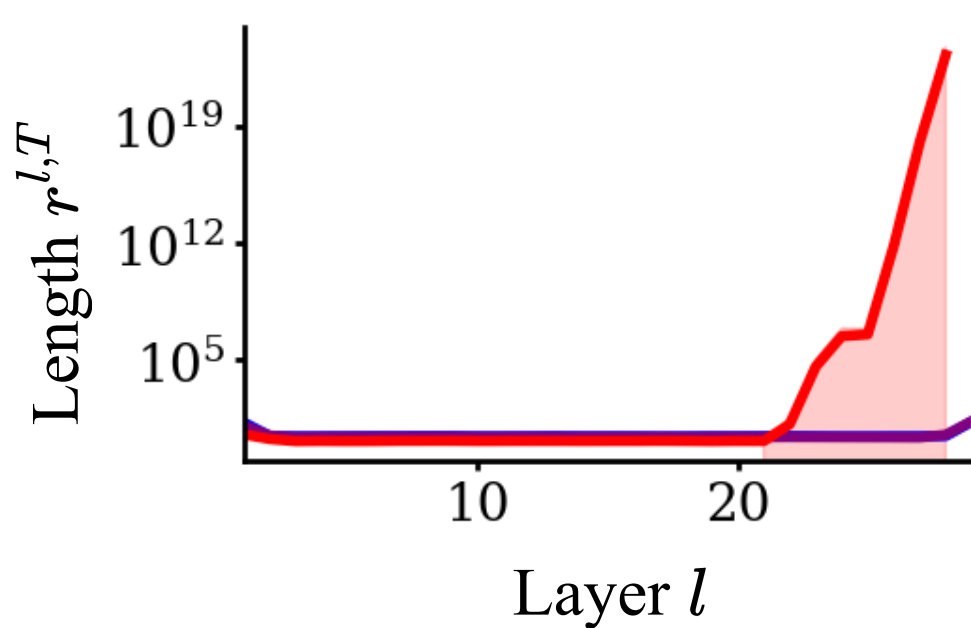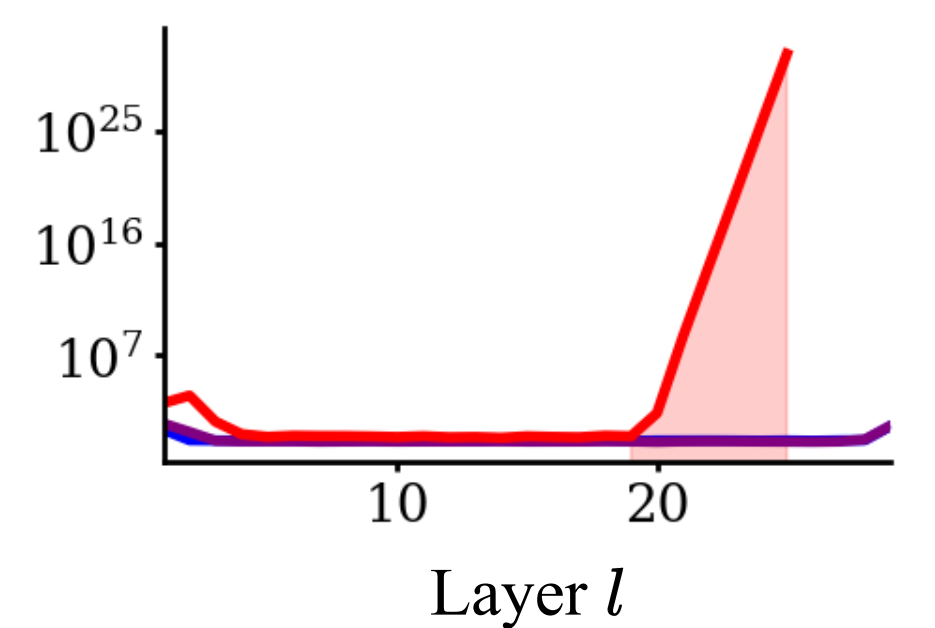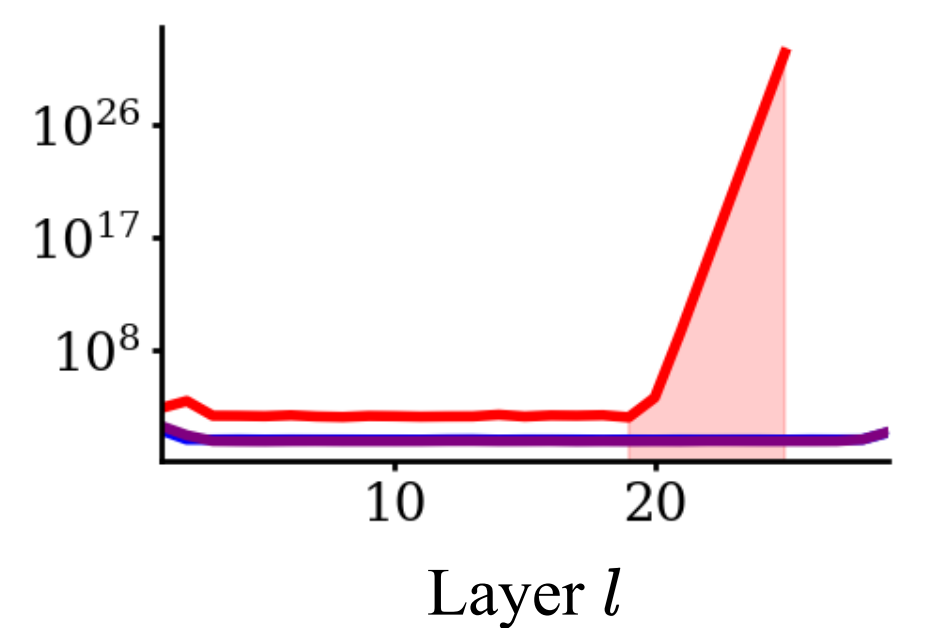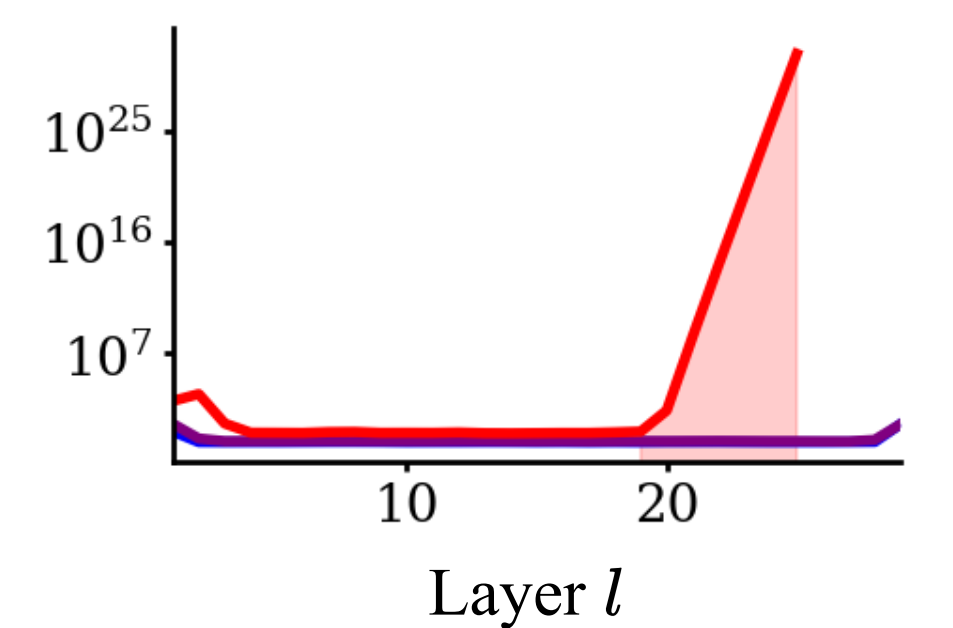 $T = 20$

Supplement: supplementary_material [file attachment]

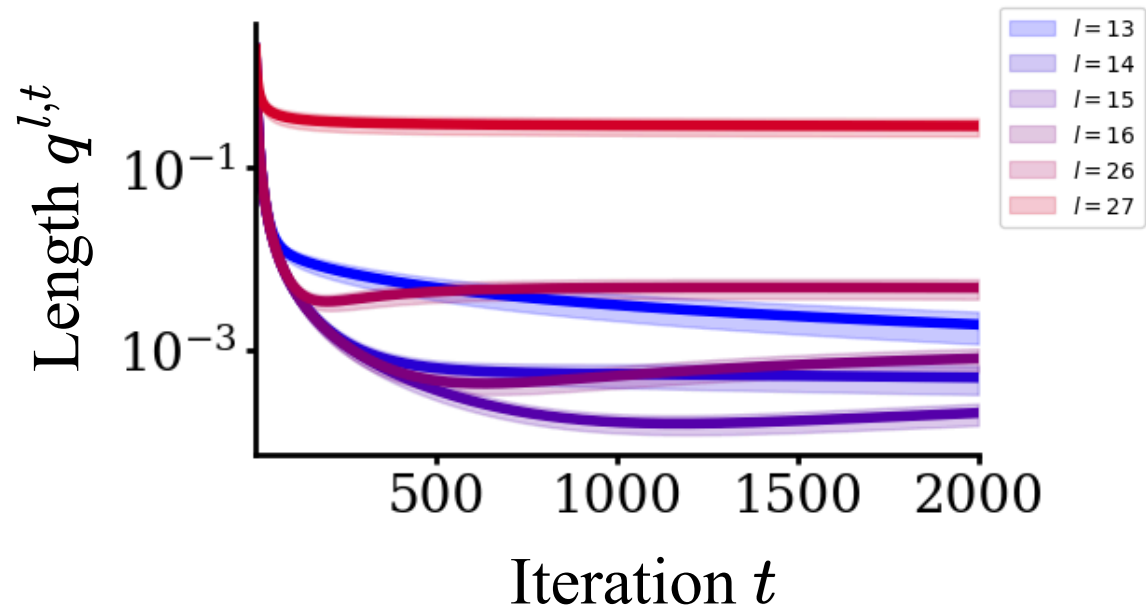

(a)

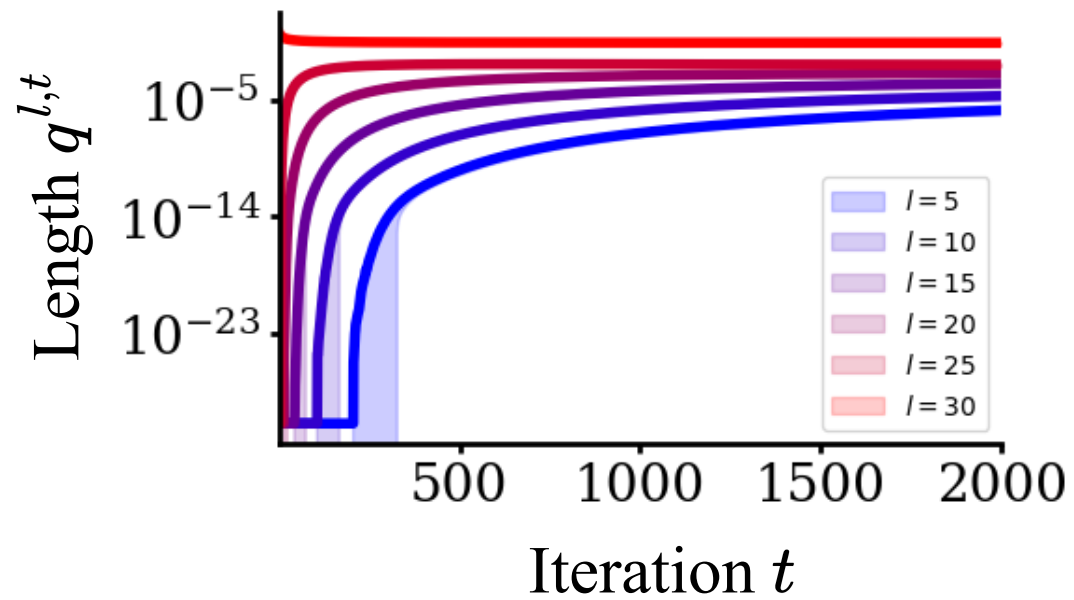

(b)

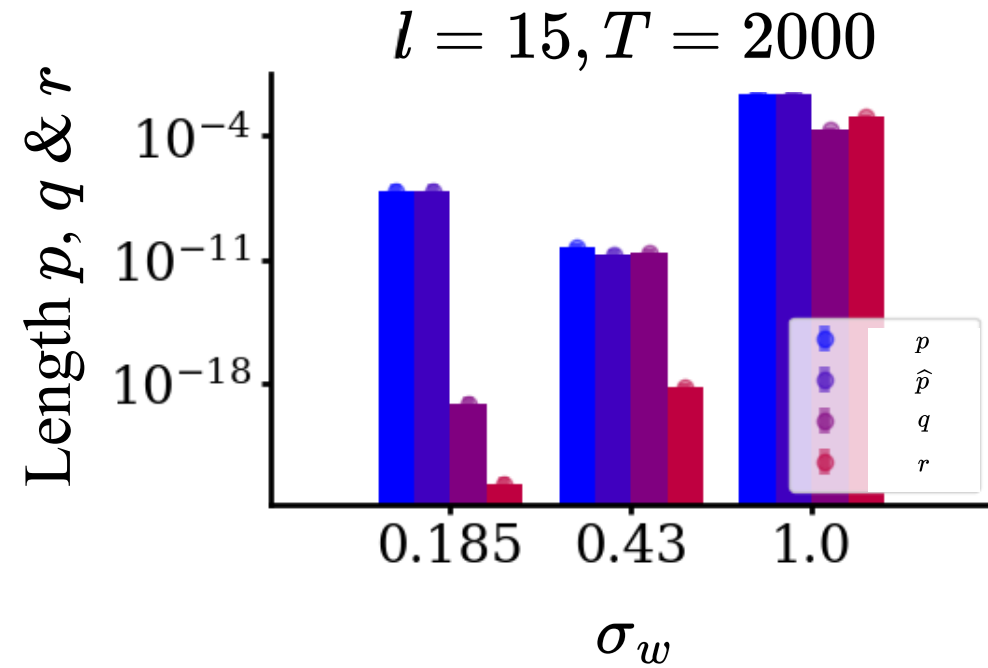

(c)

Supplement: supplementary_material [file attachment]

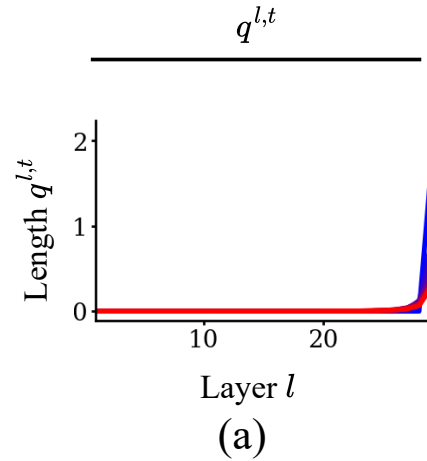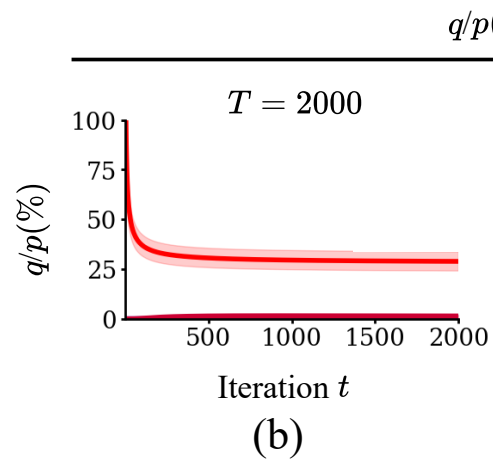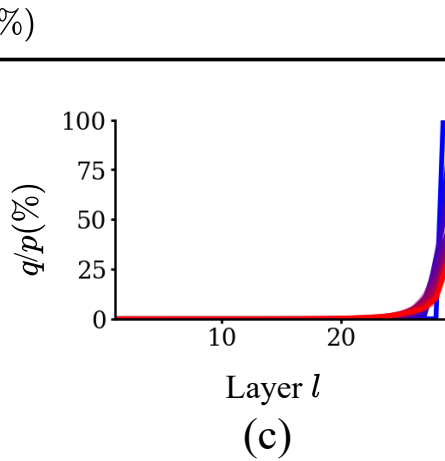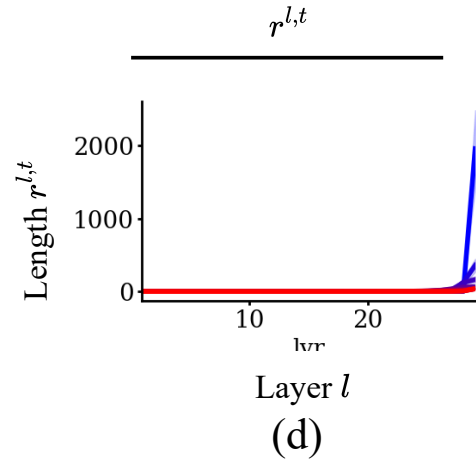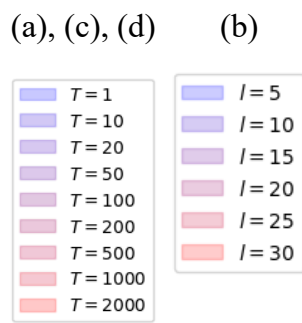

Supplement: supplementary_material [file attachment]

Linear

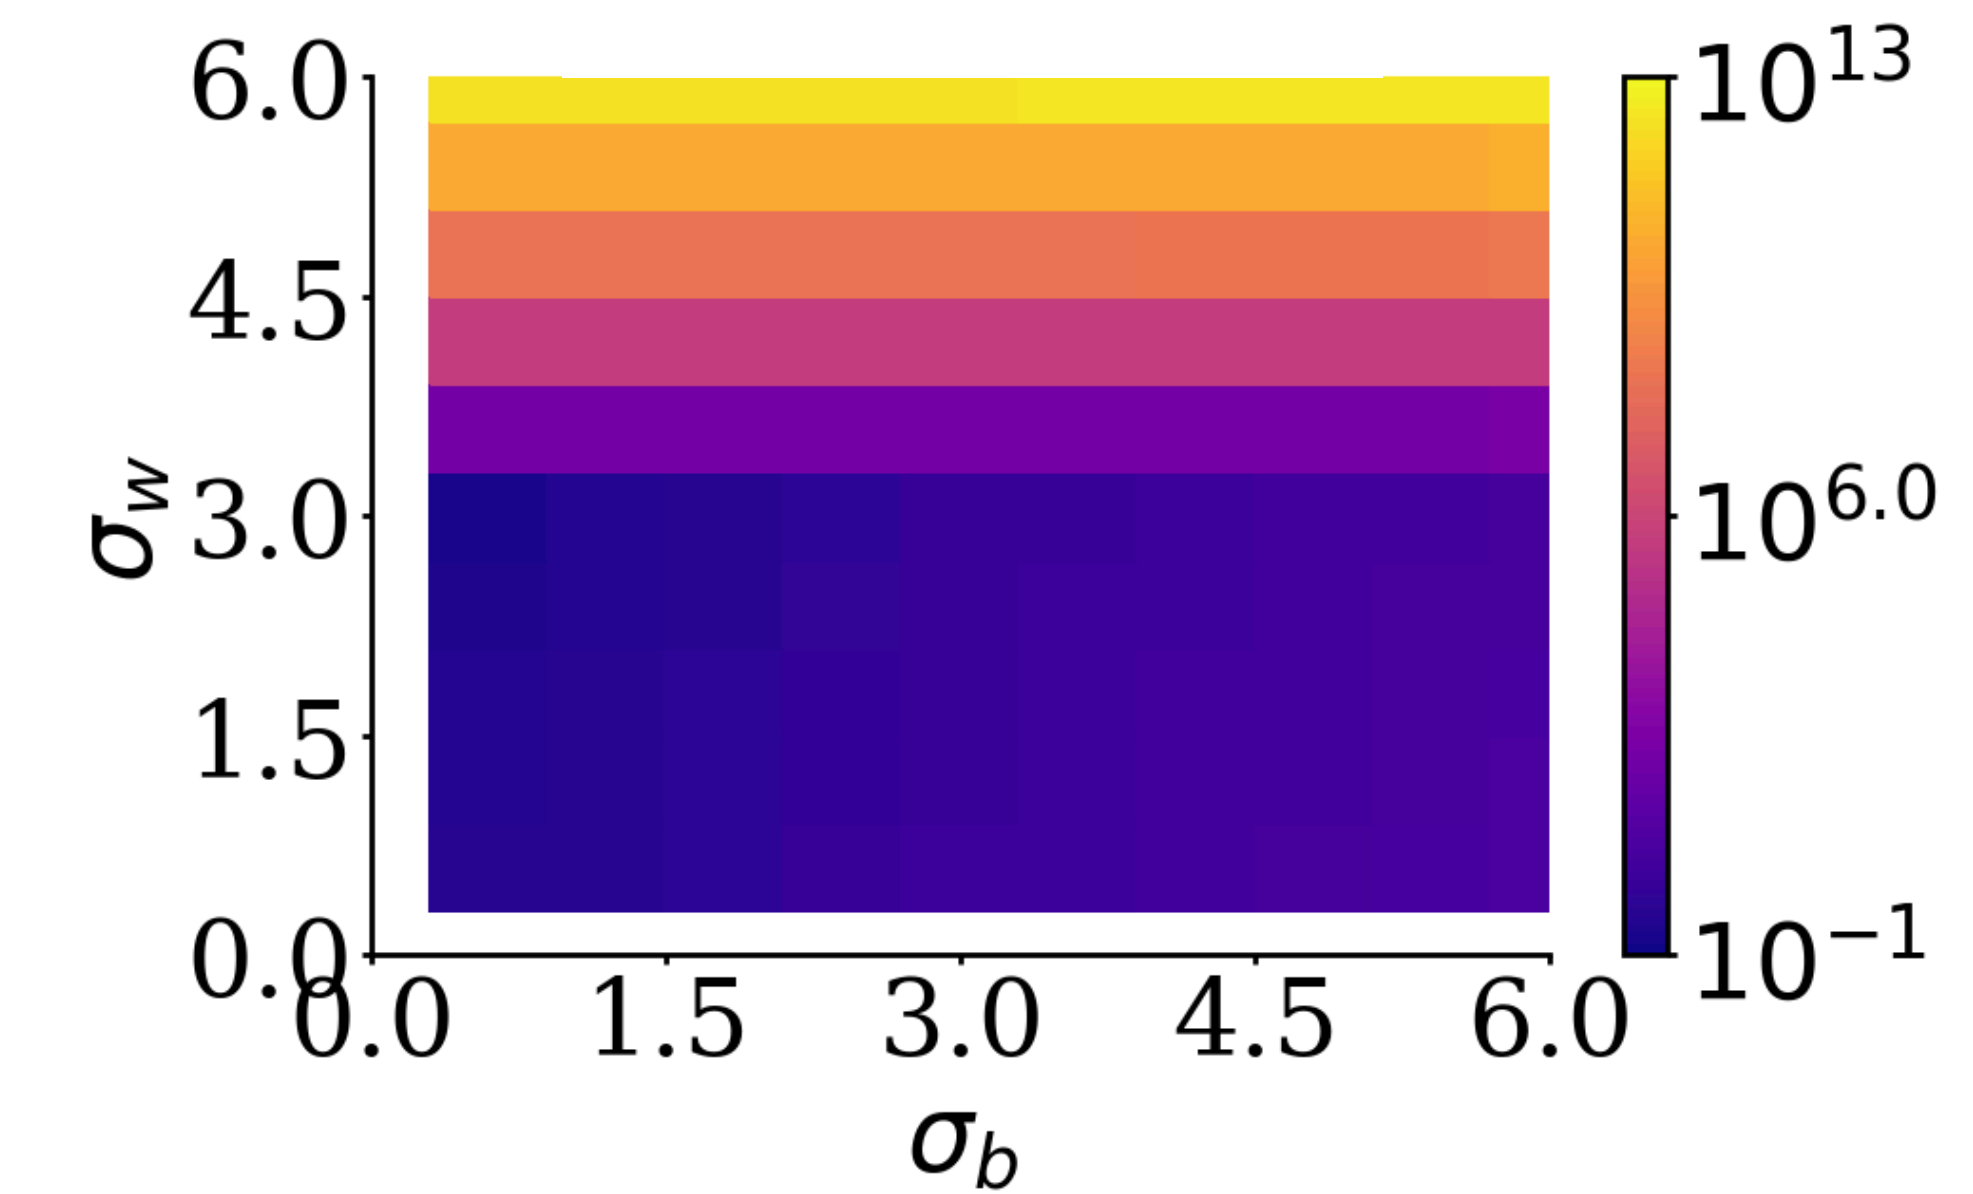

tanh

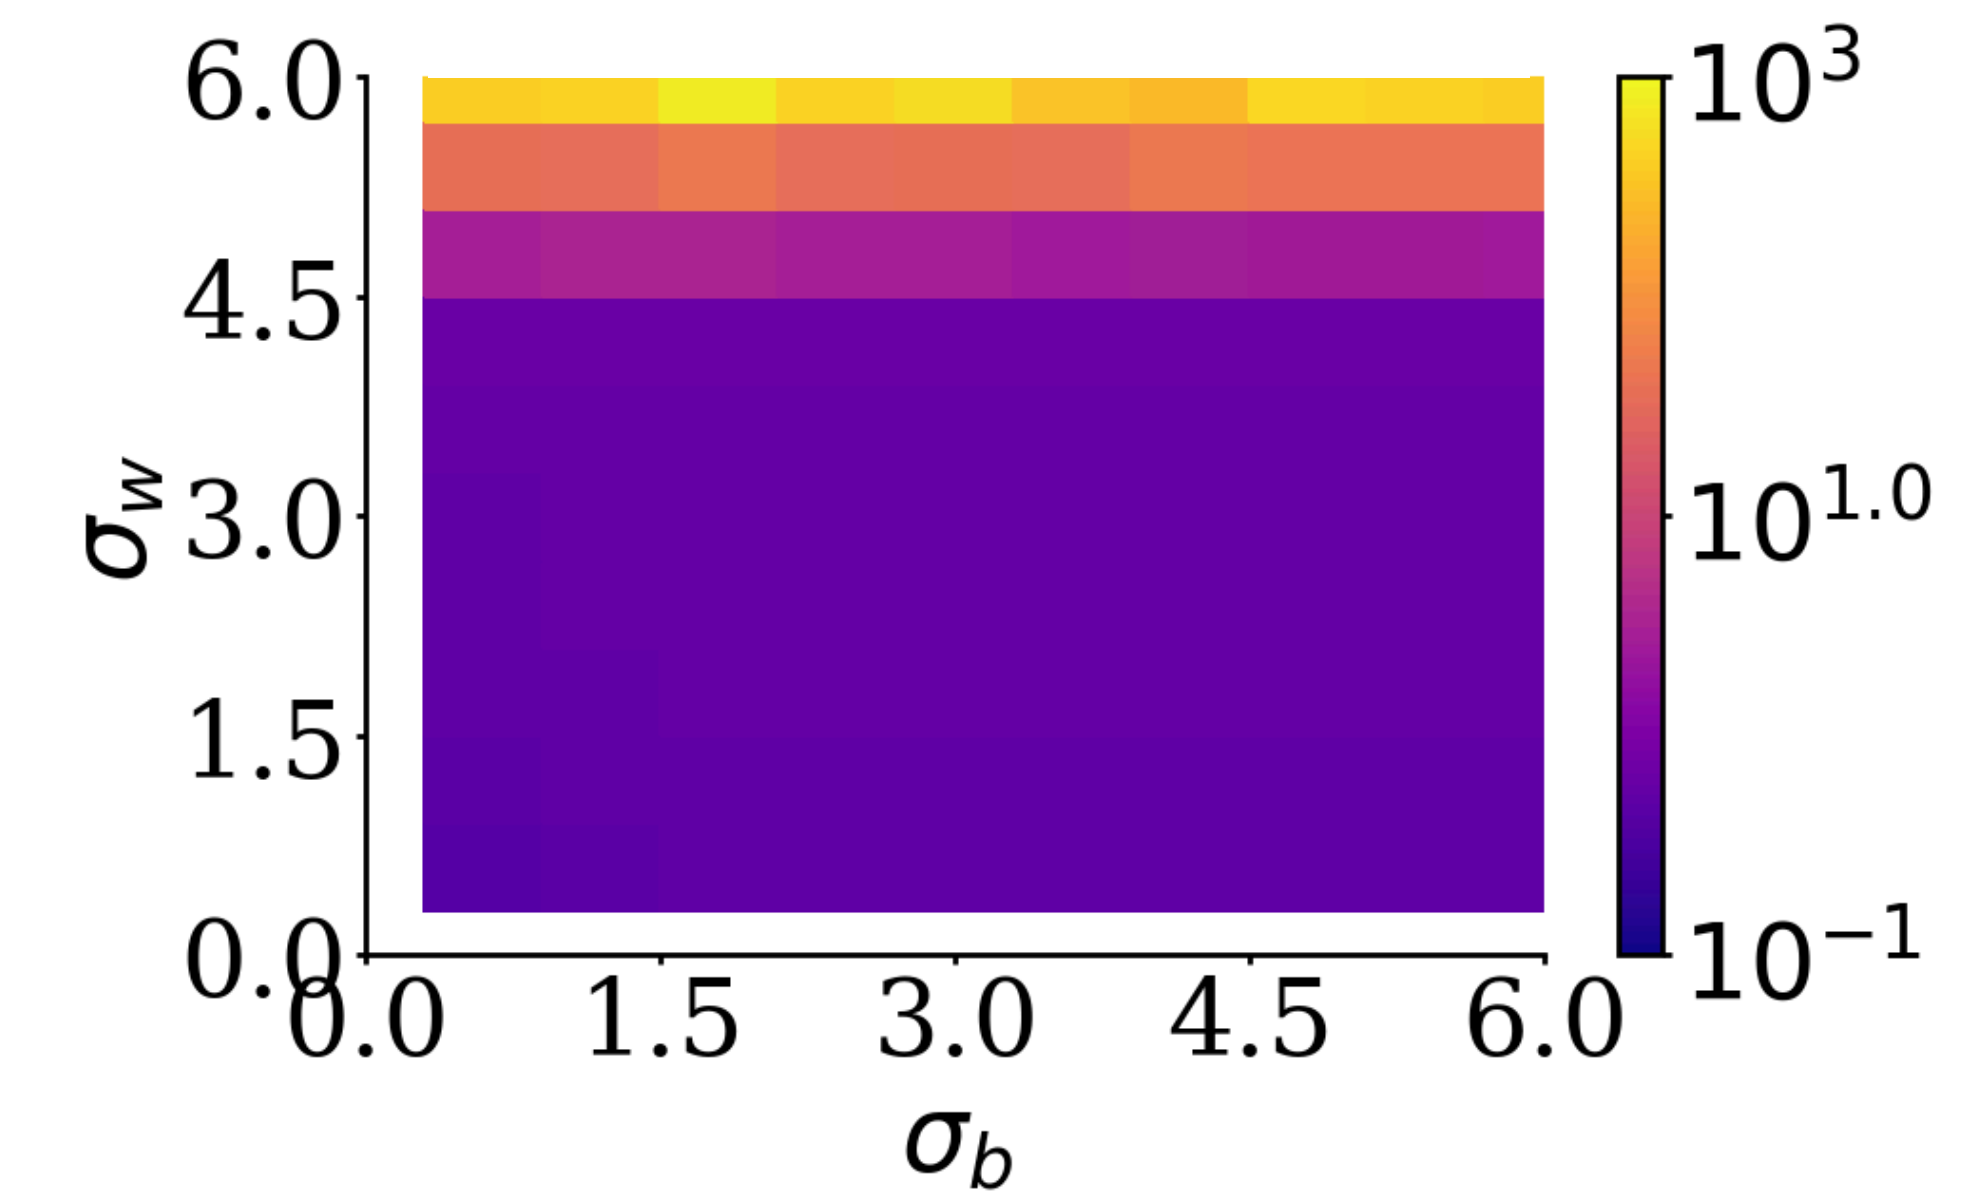

ReLU

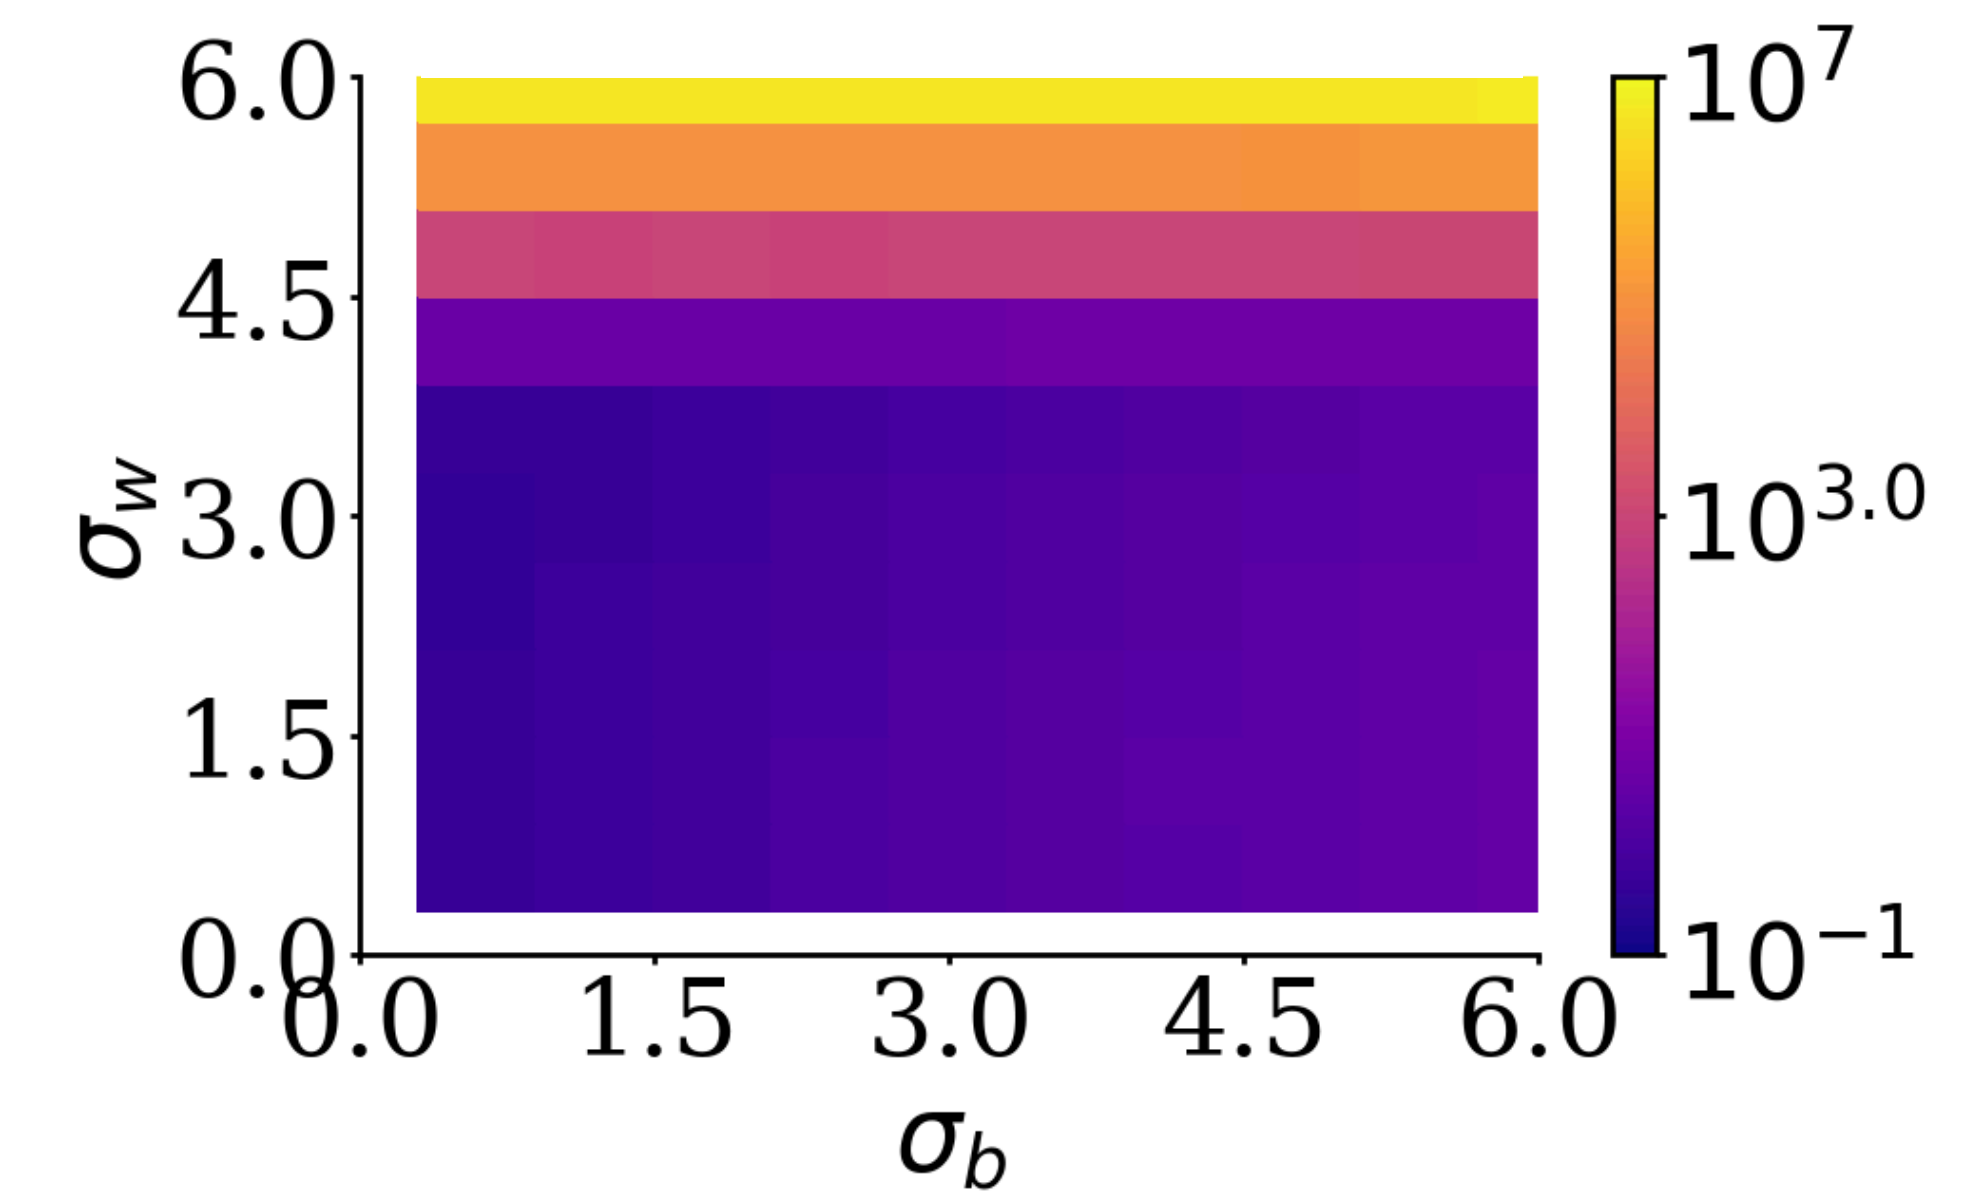

SELU

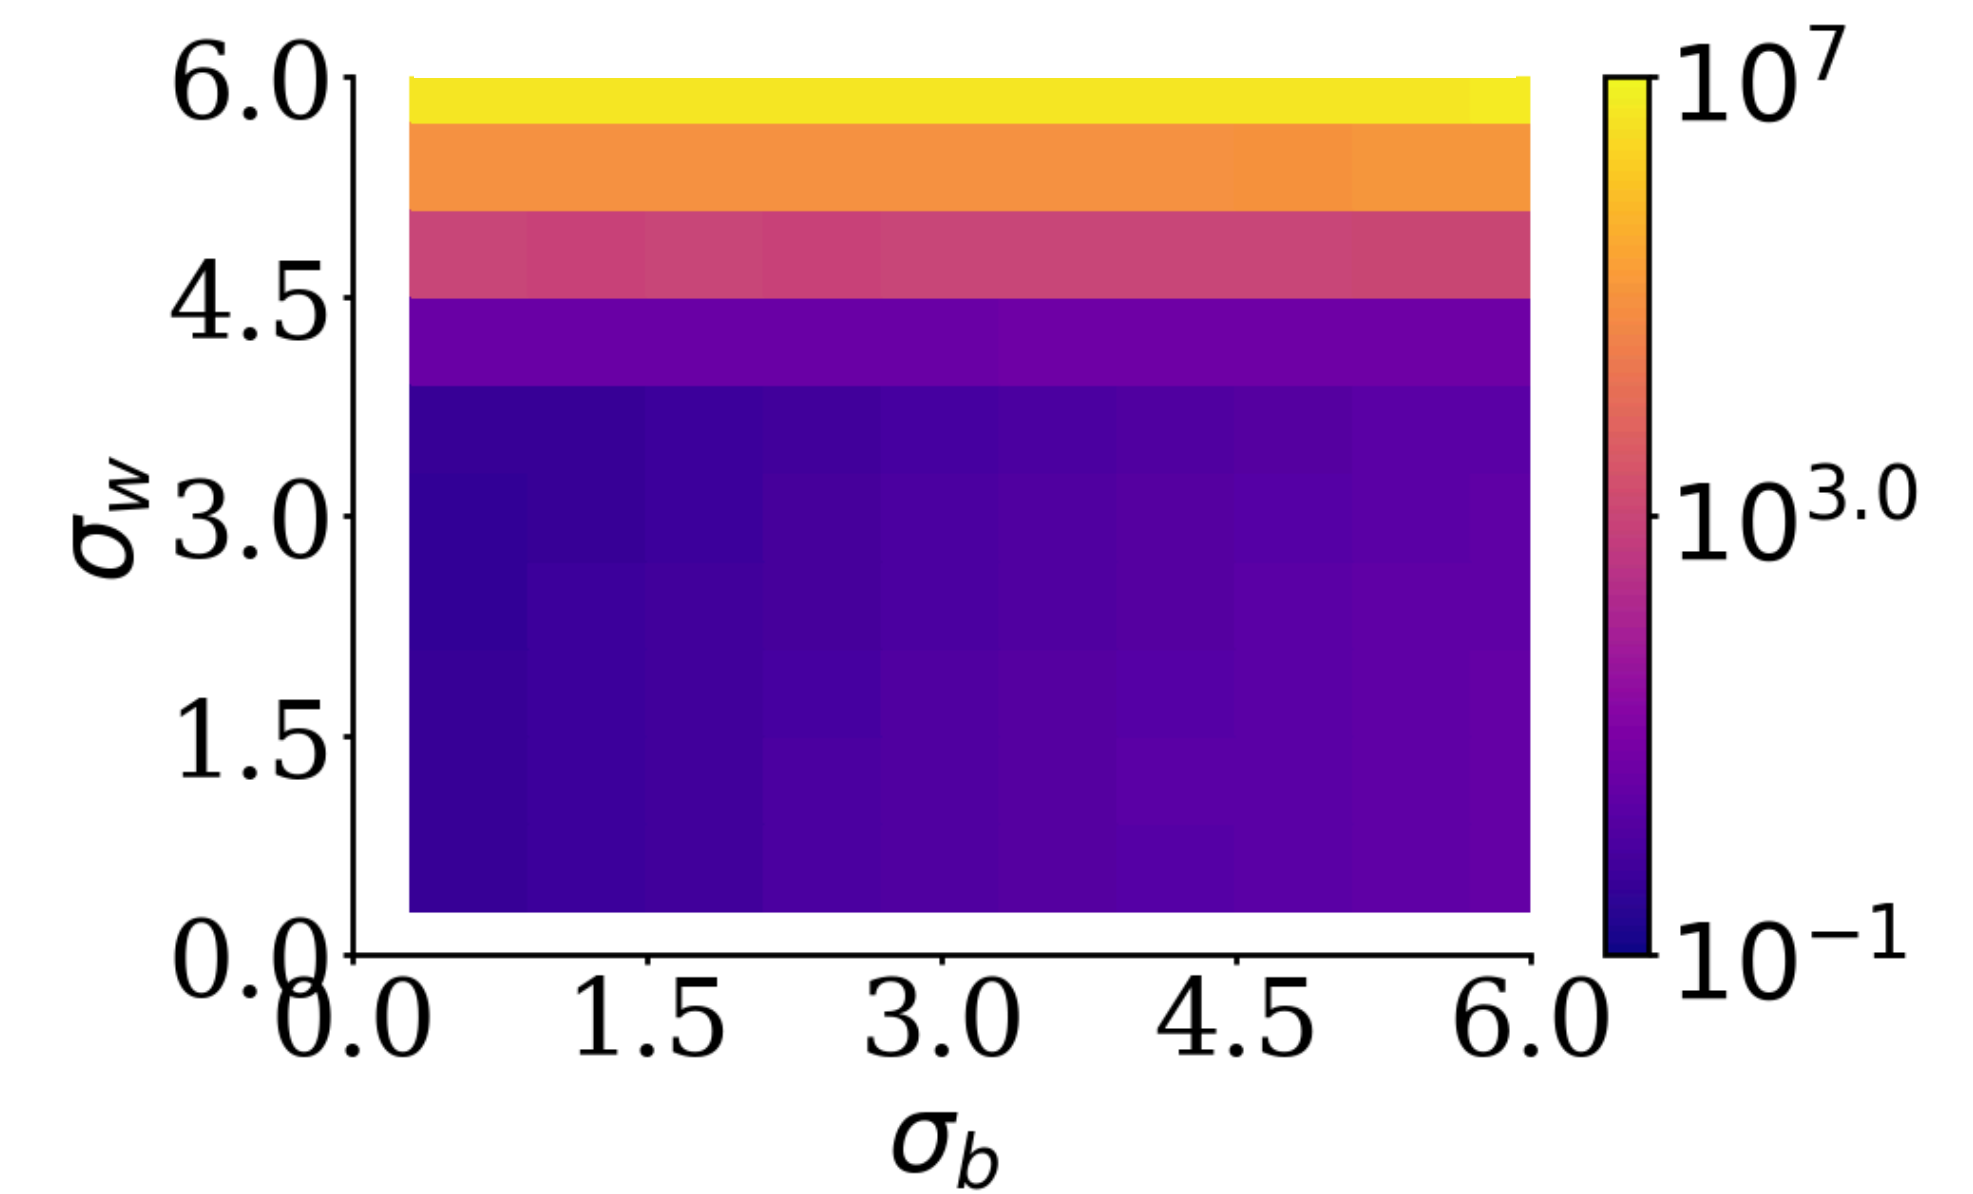

SiLU

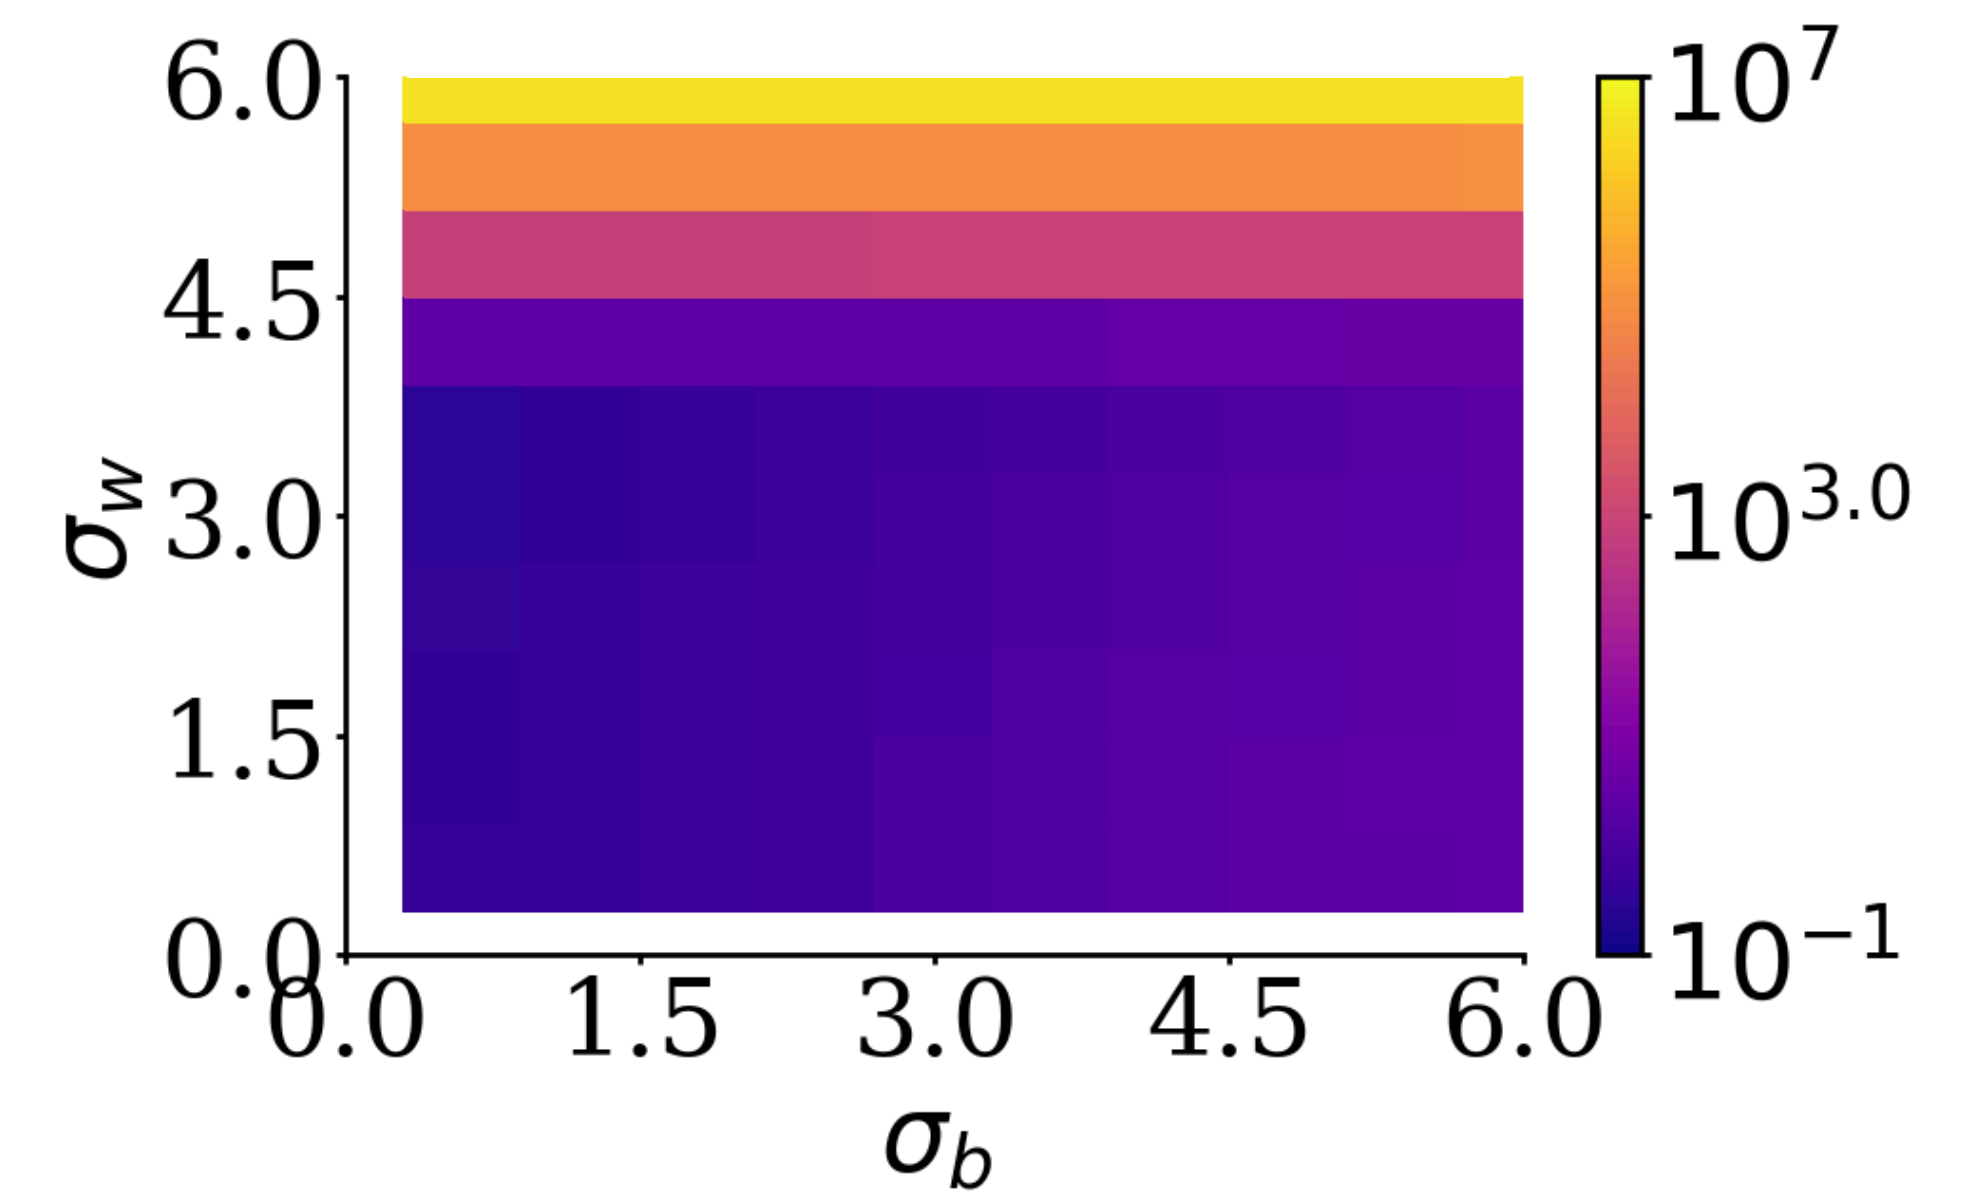

Supplement: supplementary_material [file attachment]

$T = 10$ 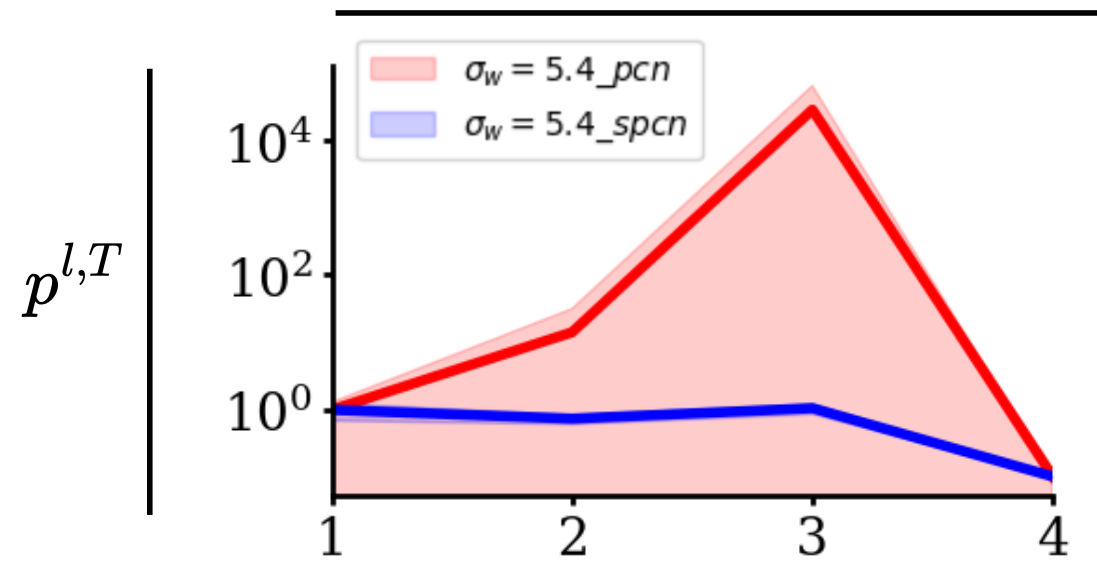

(a)

 $T = 20$ 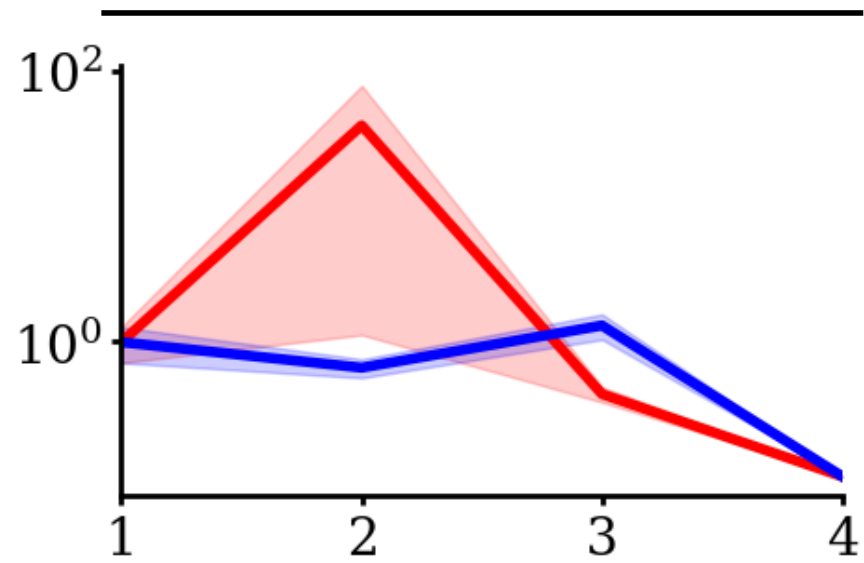

(b)

 $T = 50$ 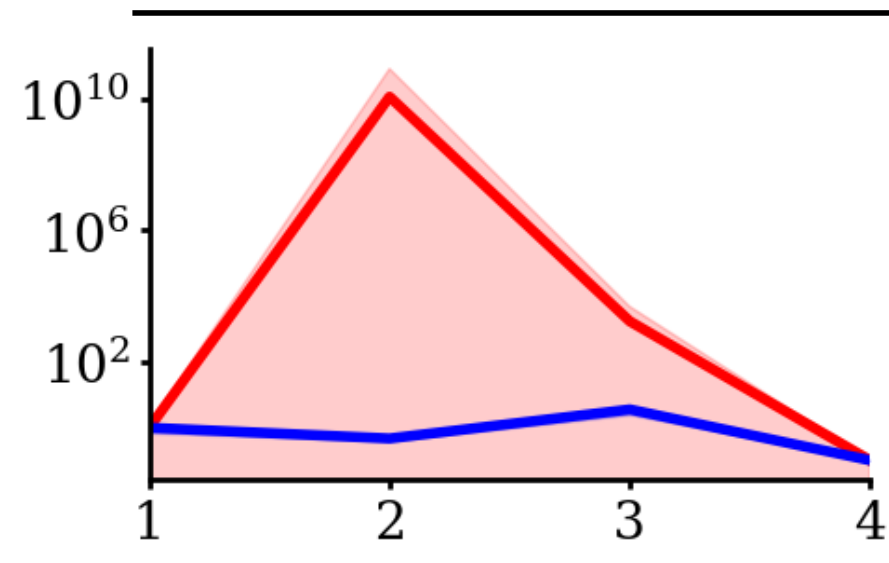

(c)

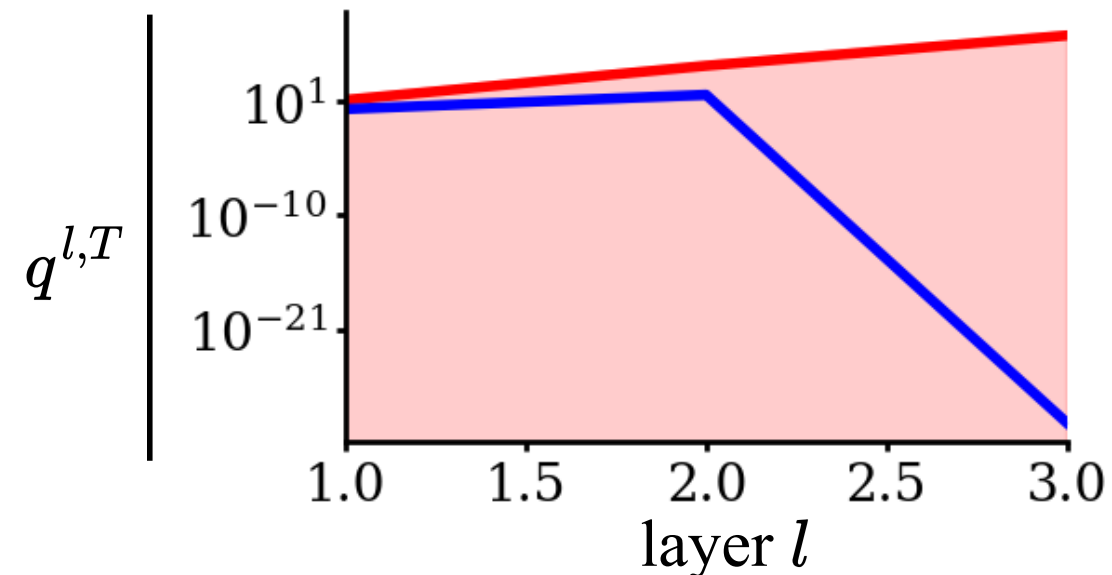

(d)

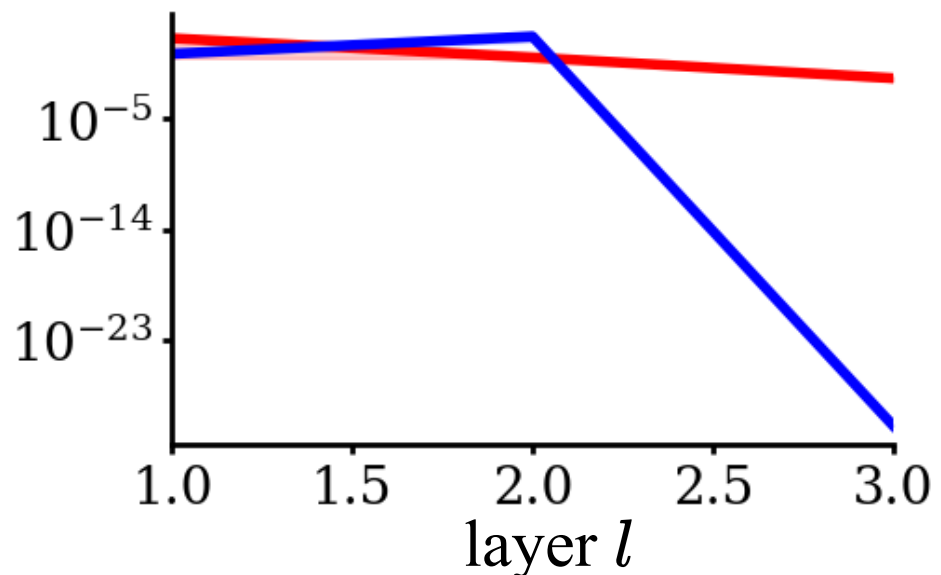

(e)

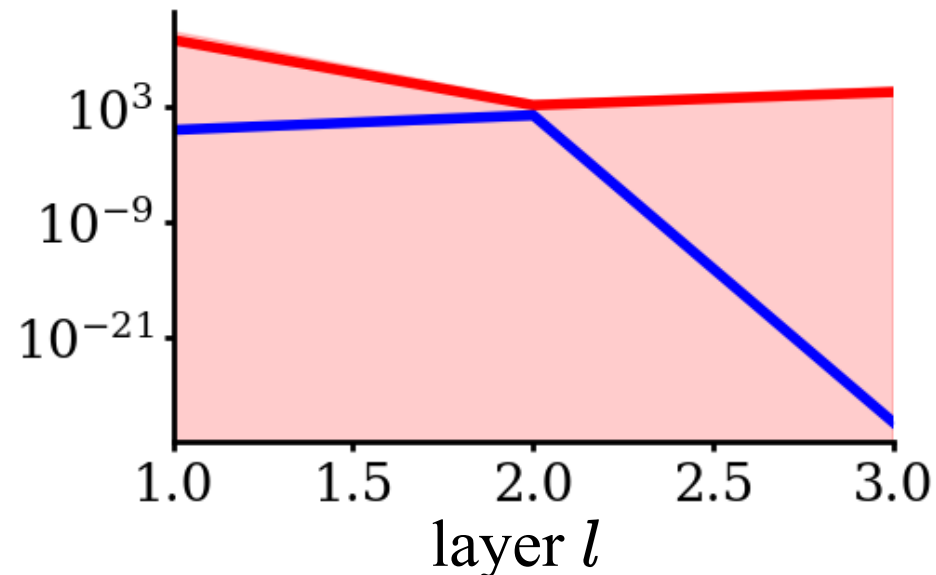

(f)

Supplement: supplementary_material [file attachment]
